1 **Tau, XMAP215/Msps and Eb1 jointly regulate microtubule polymerisation and bundle**  
2 **formation in axons**

3 Ines Hahn<sup>#, 1</sup>, Andre Voelzmann<sup>1</sup>, Jill Parkin<sup>1</sup>, Judith Fuelle<sup>1</sup>, Paula G Slater<sup>2</sup>, Laura A Lowery<sup>3</sup>,  
4 Natalia Sanchez-Soriano<sup>#†4</sup> & Andreas Prokop<sup>#†4</sup>

5 1) The University of Manchester, Manchester Academic Health Science Centre, Faculty of  
6 Biology, Medicine and Health, School of Biology, Manchester, UK

7 2) Department of Biology, Boston College, Chestnut Hill, MA, USA

8 3) Department of Medicine, Boston University Medical Center, Boston, MA, USA

9 4) Department of Molecular Physiology & Cell Signalling, Institute of Systems, Molecular &  
10 Integrative Biology, University of Liverpool, Liverpool, United Kingdom

11

12 Running title: Tau, XMAP215 and Eb1, a functional trio for microtubule polymerisation and  
13 organisation

14 Key words: *Drosophila*, neurodegeneration, axons, cytoskeleton, microtubules

15

16 # authors for correspondence:

17 The University of Manchester

18 Faculty of Life Sciences

19 Oxford Road

20 Manchester M13 9PT

21 Tel: +44-(0)161-27-51556

22 Fax: +44-(0)161-27-51505

23 [Ines.Hahn@manchester.ac.uk](mailto:Ines.Hahn@manchester.ac.uk)

24 [N.Sanchez-Soriano@liverpool.ac.uk](mailto:N.Sanchez-Soriano@liverpool.ac.uk)

25 [Andreas.Prokop@manchester.ac.uk](mailto:Andreas.Prokop@manchester.ac.uk)

26 † joined senior authors

27

28 **Summary statement:**

29 Eb1, XMAP215 and tau operate as a functional unit in axons to promote the polymerisation of  
30 microtubules and their organisation into the parallel bundles essential for axonal transport.

31

32 **Abstract**

33 Axons are the enormously long cable-like cellular processes of neurons that wire nervous  
34 systems and have to survive for up to a century in humans. We lose ~40% of axons towards  
35 high age and far more in neurodegenerative diseases. Sustaining axons requires axonal  
36 transport and dynamic morphogenetic changes, both crucially dependent on bundles of  
37 microtubules that run all along axons. How polymerisation is regulated to form, repair and

38 replace microtubules in these bundles during axon development and maintenance is virtually  
39 unknown. Here, we show in axons of *Drosophila* and *Xenopus* neurons alike that Eb1,  
40 XMAP215/Msps and Tau are key players which operate as one functional unit to promote  
41 microtubule polymerisation. Eb1 and XMAP215/Msps are interdependent core factors at the  
42 microtubule tip, whereas Tau outcompetes Eb1 binding at microtubule lattices, thus preventing  
43 its pool depletion at polymerising plus ends. In agreement with their closely interwoven  
44 functions, the three factors show the same combination of axonal loss-of-function mutant  
45 phenotypes including: (1) reduced microtubule polymerisation dynamics and shorter axon  
46 growth, indicating their importance for upholding microtubule mass in axons; (2) prominent  
47 deterioration of parallel microtubule bundles into disorganised curled conformations, indicating  
48 their key roles in promoting essential axonal architecture. We show the latter to occur through  
49 Eb1- and spectraplaklin-dependent guidance of extending microtubules. We conclude that Eb1,  
50 XMAP215/Msps and Tau jointly promote microtubule polymerisation, important to regulate the  
51 quantity and bundled organisation of microtubules and offering new ways to think about  
52 developmental and degenerative axon pathologies and how to treat them.

53

## 54 Introduction

55 Axons are the enormously long cable-like cellular processes of neurons that wire nervous  
56 systems. In humans, axons of  $\leq 15\mu\text{m}$  diameter can be up to a meter long (Prokop, 2020). They  
57 are constantly exposed to mechanical challenges, yet have to survive for up to a century; we  
58 lose  $\sim 40\%$  of axons towards high age and far more in neurodegenerative diseases (Adalbert &  
59 Coleman, 2012, Calkins, 2013, Marner, Nyengaard et al., 2003).

60 Their growth and maintenance require parallel bundles of microtubules (MTs) that run all along  
61 axons, providing the highways for life-sustaining transport and driving morphogenetic events.  
62 Consequently, bundle decay through MT mass decrease and/or MT disorganisation is a  
63 common feature in axon pathologies (summarised in (Hahn, Voelzmann et al., 2019). Key roles  
64 must be played by MT polymerisation, which is not only essential for the *de novo* formation of  
65 MT bundles during axon growth occurring in development, plasticity or regeneration, but also to  
66 repair and replace senescent MTs during long-term maintenance (Gasic & Mitchison, 2019,  
67 Schaedel, John et al., 2015, Voelzmann, Hahn et al., 2016). However, the molecular  
68 mechanisms driving MT polymerisation in axons are surprisingly little understood.

69 *In vitro*, MTs undergo polymerisation in the absence of enzymatic catalysis, but the addition of  
70 factors such as CLASPs, stathmins, tau, Eb proteins or XMAP215 can enhance and refine the  
71 process (Aher, Rai et al., 2020, Al-Bassam, Kim et al., 2010, Brouhard, Stear et al., 2008,  
72 Drechsel, Hyman et al., 1992, Li, Moriwaki et al., 2012, Manna, Thrower et al., 2009, Zanic,  
73 Widlund et al., 2013). Accordingly, many candidate regulators have been proposed in the  
74 literature to regulate MT polymerisation in axons, comprising factors that are MT plus end-  
75 associating, MT shaft-binding or involved in tubulin provision (summarised in (Voelzmann et al.,  
76 2016). We would therefore expect that MT polymerisation in axons is regulated through  
77 functional networks of proteins, but we are far from understanding what the key players are and  
78 how they are regulated by other proteins in these networks.

79 To gain such knowledge, we have chosen *Drosophila* primary neurons as one consistent model  
80 amenable to combinatorial genetics as a powerful strategy to decipher complex regulatory  
81 networks (Prokop, Beaven et al., 2013). Our previous loss-of-function studies of 9 MT plus end-  
82 associating factors in these *Drosophila* neurons (CLASP, CLIP190, dynein heavy chain, APC,  
83 p150<sup>Glued</sup>, Eb1, Short stop/Shot, doublecortin, Lis1) have taken axon length as a crude proxy

84 readout for net polymerisation, mostly revealing relatively mild axon length phenotypes, with the  
85 exception of Eb1 and Shot which cause severe axon shortening {Beaven, 2015 #6487;  
86 Sánchez-Soriano, 2009 #7139; Alves-Silva, 2012 #4930; A.V., unpublished data}.

87 Here we have taken these analyses to the next level. We show that three factors, Eb1,  
88 XMAP215/Msps and Tau, share a unique combination of mutant phenotypes, including reduced  
89 axonal MT polymerisation in frog and fly neurons in culture and *in vivo*. Our data reveal that the  
90 three factors operate as a functional unit: whereas Eb1 and XMAP215/Msps act  
91 interdependently at MT plus ends, Tau outcompetes Eb1 binding at MT lattices, thus preventing  
92 its pool depletion at polymerising MT plus ends. By upholding MT polymerisation, this functional  
93 trio also promotes the bundle conformation of axonal MTs through a guidance mechanism  
94 mediated by the spectraplaklin Shot.

95

## 96 **Methods**

### 97 Fly stocks

98 Loss-of-function mutant stocks used in this study were the deficiencies *Df(3R)Antp17 (tub<sup>def</sup>*;  
99 removing both *atub84B* and *atub84D*; Duncan & Kaufman, 1975, Jenkins, Saunders et al.,  
100 2017), *Df(2L)Exel6015 (sta<sup>Df</sup>*; Duncan, Lytle et al., 2013), *Df(3L)BSC553 (clasp<sup>Df</sup>*; Bloomington  
101 stock #25116; Beaven, Dzhindzhev et al., 2015), *Df(3R)tauMR22 (tau<sup>Df</sup>*; Doerflinger, Benton et  
102 al., 2003) and the loss-of-function mutant alleles *α-tub84B<sup>KO</sup>* (an engineered null-allele; Jenkins  
103 et al., 2017), *chromosome bows<sup>2</sup> (clasp<sup>2</sup>*, an amorph allele; Inoue, do Carmo Avides et al.,  
104 2000), *Eb1<sup>04524</sup>*, *Eb1<sup>5</sup>* (strong loss-of-function mutant alleles; Elliott, Cullen et al., 2005),  
105 *futsch<sup>P158</sup> (MAP1B*; a deficiency uncovering the *futsch* locus; Hummel, Krukkert et al., 2000),  
106 *msps<sup>A</sup>* (a small deletion causing a premature stop after 370 amino acids; gift from H. Ohkura,  
107 unpublished), *msps<sup>146</sup>* (Brittle & Ohkura, 2005), *sentin<sup>AB</sup> (short spindle2<sup>AB</sup>*, *ssp2<sup>AB</sup>*; Gluszek,  
108 Cullen et al., 2015), *tacc<sup>1</sup> (dTACC<sup>1</sup>*; Gergely, Kidd et al., 2000), *shot<sup>3</sup>* (the strongest available  
109 allele of *short stop*; Kolodziej, Jan et al., 1995, Sánchez-Soriano, Travis et al., 2009), *sta<sup>KO</sup>*  
110 (Yang, Inaki et al., 2012), *tau<sup>KO</sup>* (a null allele; Burnouf, Gronke et al., 2016). Gal4 driver lines  
111 used were *elav-Gal4* (1<sup>st</sup> and 3<sup>rd</sup> chromosomal, both expressing pan-neuronally at all stages;  
112 Luo, Liao et al., 1994), *GMR31F10-Gal4* (Bloomington #49685; expressing in T1 medulla  
113 neurons; Qu, Hahn et al., 2019). Lines for targeted gene expression were *UAS-Eb1-GFP* and  
114 *UAS-shot-Ctail-GFP* (Alves-Silva, Sánchez-Soriano et al., 2012), *UAS-shot<sup>ΔABD</sup>-GFP* (Qu,  
115 2015), *UAS-shot<sup>3MTLS</sup>-GFP* (Alves-Silva et al., 2012), *UAS-dtau-GFP* (Doerflinger et al., 2003),  
116 *UAS-GFP-α-tubulin84B* (Grieder, de Cuevas et al., 2000) and further lines generated here (see  
117 below).

118

### 119 Drosophila primary cell culture

120 *Drosophila* primary neuron cultures were done as described previously (Prokop, Küppers-  
121 Munther et al., 2012, Qu, Hahn et al., 2017). Stage 11 embryos were treated for 90 s with bleach  
122 to remove the chorion, sterilized for ~30 s in 70% ethanol, washed in sterile Schneider's medium  
123 containing 20% fetal calf serum (Schneider's/FCS; Gibco), and eventually homogenized with  
124 micro-pestles in 1.5 centrifuge tubes containing 21 embryos per 100 μl dispersion medium  
125 (Prokop et al., 2012) and left to incubated for 4 min at 37°C. Dispersion was stopped with 200  
126 μl Schneider's/FCS, cells were spun down for 4 mins at 650 g, supernatant was removed and  
127 cells re-suspended in 90 μl of Schneider's/FCS, and 30 μl drops were placed in culture  
128 chambers and covered with cover slips. Cells were allowed to adhere to cover slips for 90-120

129 min either directly on glass or on cover slips coated with a 5 µg/ml solution of concanavalin A,  
130 and then grown as a hanging drop culture at 26°C as indicated.

131 To eliminate a potential maternal rescue of mutants (i.e. reduction of the mutant phenotype due  
132 to normal gene product deposition from the wildtype gene copy of the heterozygous mothers in  
133 oocytes (Prokop, 2013), we used a pre-culture strategy (Prokop et al., 2012, Sánchez-Soriano,  
134 Gonçalves-Pimentel et al., 2010) where cells were incubated in a tube for 7 days before they  
135 were plated on coverslips.

136 For cultures from larval brains, L3 brains (2-3 per cover slip) were dissected in PBS, transferred  
137 into Schneider's/FCS medium, washed three times with medium and then proceed with  
138 homogenisation and dispersion as explained above

139 Transfection of *Drosophila* primary neurons was executed as described previously (Qu et al.,  
140 2019). In brief, 70-75 embryos per 100 µl dispersion medium were used. After the washing step  
141 and centrifugation, cells were re-suspended in 100 µl transfection medium [final media  
142 containing 0.1-0.5 µg DNA and 2 µl Lipofecatmine 2000 (L2000, Invitrogen), incubation  
143 following manufacturer's protocols (Thermo Fisher, Invitrogen) and kept for 24 hrs at 26°C. Cells  
144 were then treated again with dispersion medium, re-suspended in culture medium and plated  
145 out as described above.

146

#### 147 Xenopus primary neuron experiments

148 Xenopus primary neuron cultures were obtained from embryonic neural tube. Eggs collected  
149 from female *X. laevis* frogs were fertilised in vitro, dejellied and cultured following standard  
150 methods (Sive, Grainger et al., 2010). Embryos were grown to stage 22–24 (Nieuwkoop & J.,  
151 1994), and neural tubes were dissected as described (Lowery, Faris et al., 2012). Three neural  
152 tubes were transferred to an Eppendorf tube containing 150 uL CMF-MMR (0.1 M NaCl, 2.0  
153 mM KCl, 1.0 mM EDTA, 5.0 mM HEPES, pH 7.4), 10 min later centrifuged at 1000 g for 5 min,  
154 and 150 uL of Steinberg's solution (58 mM NaCl, 0.67 mM KCl, 0.44 mM Ca(NO<sub>3</sub>)<sub>2</sub>, 1.3 mM  
155 MgSO<sub>4</sub>, 4.6 mM Tris, pH 7.8) was added to the supernatant to follow with the tissue dissociation  
156 using a fire polished glass Pasteur pipet. Cells were seeded in 100 ug/mL Poly-L-lysine and 10  
157 µg/ml laminin pre-treated 60mm plates, and after 2 hr the media was replaced by plating culture  
158 media (50% Ringer's, 49% L-15 media, 1% Fetal Bovine Serum, 25 ng/µl NT3 and BDNF, plus  
159 50 µg/ml penicillin/streptomycin and gentamycin, pH 7.4 and filter sterilized) and kept for 24 hr  
160 before imaging.

161 All experiments were approved by the Boston College Institutional Animal Care and Use  
162 Committee and performed according to national regulatory standards.

163 The embryos were injected four times in dorsal blastomeres at two-to-four cell stage with 6 ng  
164 of the validated XMAP215 morpholino (MO; Lowery, Stout et al., 2013), 10 ng of the validated  
165 Tau MO (Liu, Wang et al., 2015), and/or 5 ng of a newly designed splice site MO for EB3  
166 (3'CTCCCAATTGTCACCTACTTTGTGCG5'; for verification see Fig3-S1), in order to obtain a  
167 50% knockdown of each.

168 To assess EB1 comet dynamics and comet amounts, 300 pg of MACF43-Ctail::GFP, an Eb  
169 protein-binding 43-residue fragment derived from the C-terminal regions of hMACF2 (human  
170 microtubule actin crosslinking factor 2; Fig.3F-F'''; Honnappa, Gouveia et al., 2009, Slater,  
171 Cammarata et al., 2019), was co-injected with the MO.

#### 172 Immunohistochemistry

173 Primary fly neurons were fixed in 4% paraformaldehyde (PFA; in 0.05 M phosphate buffer, pH  
174 7–7.2) for 30 min at room temperature (RT). For anti-Eb1 and anti-GTP-tubulin staining, cells  
175 were fixed for 10 mins at -20°C in +TIP fix (90% methanol, 3% formaldehyde, 5 mM sodium  
176 carbonate, pH 9; stored at -80°C and added to the cells) (Rogers, Rogers et al., 2002), then  
177 washed in PBT (PBS with 0.3% TritonX). Antibody staining and washes were performed with  
178 PBT. Staining reagents: anti-tubulin (clone DM1A, mouse, 1:1000, Sigma; alternatively, clone  
179 YL1/2, rat, 1:500, Millipore Bioscience Research Reagents); anti-DmEb1 (gift from H. Ohkura;  
180 rabbit, 1:2000; Elliott et al., 2005); anti-GTP-tubulin (hMB11; human, 1:200; AdipoGen; Dimitrov,  
181 Quesnoit et al., 2008); anti-Shot (1:200, guinea pig; Strumpf & Volk, 1998); anti-Elav (Elav-  
182 7E8A10; rat, 1:1000; Developmental Studies Hybridoma Bank, The University of Iowa, IA, USA;  
183 O'Neill, Rebay et al., 1994); anti-GFP (ab290, Abcam, 1:500); Cy3-conjugated anti-HRP (goat,  
184 1:100, Jackson ImmunoResearch); F-actin was stained with phalloidin conjugated with  
185 TRITC/Alexa647, FITC or Atto647N (1:100 or 1:500; Invitrogen and Sigma). Specimens were  
186 embedded in ProLong Gold Antifade Mountant (ThermoFisher Scientific).

187

#### 188 Western blot analysis of *Xenopus* embryos

189 For protein extraction, 10 embryos were transferred to a centrifuge tube with 800 µl lysis buffer  
190 (50 mM Tris pH 7.5, 5% glycerol, 0.2% IGEPAL/NP-40, 1 mM EDTA, 1.5 mM MgCl<sub>2</sub>, 125 mM  
191 NaCl, 25 mM NaF, 1 mM Na<sub>3</sub>VO<sub>4</sub>), homogenised with a sterile pestle and, after 10 min,  
192 centrifuged at 13000 rpm for 15-20 min. The supernatant was collected and the protein  
193 concentration determined with the Micro BCA™ Protein Assay Kit (Thermo Fisher Scientific).

194 80 µg protein were loaded into a 10 % SDS gel and stained with anti-Tau (clone Tau46, T9450,  
195 mouse, 1:1000, Sigma-Aldrich).

196

#### 197 Dissection of adult heads

198 For *in vivo* studies, brain dissections were performed in Dulbecco's PBS (Sigma, RNBF2227)  
199 after briefly sedating them on ice. Dissected brains with their laminas and eyes attached were  
200 placed into a drop of Dulbecco's PBS on MatTek glass bottom dishes (P35G1.5-14C), covered  
201 by coverslips and immediately imaged with a 3i Marianas Spinning Disk Confocal Microscope.

202

#### 203 Microscopy and data analysis

204 Standard imaging was performed with AxioCam 506 monochrome (Carl Zeiss Ltd.) or  
205 MatrixVision mvBlueFox3-M2 2124G digital cameras mounted on BX50WI or BX51 Olympus  
206 compound fluorescent microscopes. For the analysis of *Drosophila* and *Xenopus* primary  
207 neurons, we used the following parameters:

208 Axon length was measured from cell body to growth cone tip using the segmented line tool of  
209 ImageJ (Alves-Silva et al., 2012, Sánchez-Soriano et al., 2010).

210 Degree of MT disorganisation in axons was measured as "MT disorganisation index" (MDI)  
211 described previously (Qu et al., 2019, Qu et al., 2017); in short: the area of disorganisation was  
212 measured with the freehand selection in ImageJ; this value was then divided by axon length  
213 (see above) multiplied by 0.5 µm (typical axon diameter, thus approximating the expected area  
214 of the axon if it were not disorganised).

215 Eb1 comet amounts were approximated by using product of comet mean intensity and length.  
216 For this, a line was drawn through each comet (using the segmented line tool in FIJI) and length

217 as well as mean staining intensity (of Eb1 or GTP-tub in fixed *Drosophila* and MACF43::GFP in  
218 a movie still in *Xenopus* neurons) was determined.

219 To measure MT disorganisation in the optic lobe of adult flies, *GMR31F10-Gal4* (Bloomington  
220 #49685) was used to express *UAS- $\alpha$ -tubulin84B-GFP* (Grieder et al., 2000) in a subset of  
221 lamina axons which projects within well-ordered medulla columns (Prokop & Meinertzhagen,  
222 2006). Flies were left to age for 26-27 days (about half their life expectancy) and then their  
223 brains were dissected out, mounted in Mattek dishes and imaged using a 3i spinning disk  
224 confocal system at the ITM Biomedecial imaging facility at the University of Liverpool. A section  
225 of the medulla columns comprising the 4 most proximal axonal terminals was used to quantify  
226 the number of swellings and regions with disorganised MTs.

227 To measure MT polymerisation dynamics, movies were collected on an Andor Dragonfly200  
228 spinning disk upright confocal microscope (with a Leica DM6 FS microscope frame) and using  
229 a 100x/1.40 UPlan SAPO (Oil) objective. Samples were excited using 488nm (100%) and  
230 561nm (100%) diode lasers via Leica GFP and RFP filters respectively. Images were collected  
231 using a Zyla 4.2 Plus sCMOS camera with a camera gain of 1x. The incubation temperature  
232 was set to 26°C. Time lapse movies were constructed from images taken every 1 s for 1 mins.  
233 To measure comet velocity and lifetime, a line was drawn that followed the axon using the  
234 segmented line tool in ImageJ. A kymograph was then constructed from average intensity in  
235 FIJI using the KymoResliceWide macro (Cell Biology group, Utrecht University) and events  
236 scored via the Velocity Measurement Tool Macro (Volker Baecker, INSERM, Montpellier, RIO  
237 Imaging; J. Rietdorf, FMI Basel; A. Seitz, EMBL Heidelberg). For each condition at least 15 cells  
238 were analysed in  $\geq 2$  independent repeats.

239 Time lapse imaging for *Xenopus* primary cultures was performed with a CSU-X1M 5000  
240 spinning-disk confocal (Yokogawa, Tokyo, Japan) on a Zeiss Axio Observer inverted motorized  
241 microscope with a Zeiss 63x Plan Apo 1.4 numerical aperture lens (Zeiss, Thornwood, NY).  
242 Images were acquired with an ORCA R2 charge-coupled device camera (Hamamatsu,  
243 Hamamatsu, Japan) controlled with Zen software. Time lapse movies were constructed from  
244 images taken every 2 s for 1 min. The MACF43 comets' velocities and lifetime were analysed  
245 with plusTipTracker software. The same parameters were used for all movies: maximum gap  
246 length, eight frames; minimum track length, three frames; search radius range, 5–12 pixels;  
247 maximum forward angle, 50°; maximum backward angle, 10°; maximum shrinkage factor, 0.8;  
248 fluctuation radius, 2.5 pixels; and time interval 2 s.

249 Images were derived from at least 2 independent experimental repeats performed on different  
250 days, for each of which at least 3 independent culture wells were analysed by taking a minimum  
251 of 20 images per slide. For statistical analyses, Kruskal–Wallis one-way ANOVA with *post hoc*  
252 Dunn's test or Mann–Whitney Rank Sum Tests (indicated as  $P_{MW}$ ) were used to compare  
253 groups,  $r$  and  $p$ -value for correlation were determined via non-parametric Spearman correlation  
254 analysis. All raw data of our analyses are provided as supplementary Excel files T1-6.

255

## 256 Molecular biology

257 To generate the *UAS-msps<sup>FL</sup>-GFP* (aa1-2050) and *UAS-msps <sup>$\Delta$ Cterm</sup>* (aa1-1322) constructs,  
258 eGFP was PCR-amplified from pcDNA3-EGFP and *msps* sequences from cDNA clone  
259 *LP04448* (DGRC; FBcl0189229) using the following primers:

260 *msps<sup>FL</sup>* and *msps <sup>$\Delta$ Cterm</sup>* fw:  
261 GAATAGGGAATTGGGAATTCGTTAGGCGCGCCAACATGGCCGAGGACACAGAGTAC

262 *mmps<sup>FL</sup>* rev:  
263 CAAGAAAGAGAATCATGCCCAAGGGCCCGGTAGCGGCAGCGGTAGCGTGAGCAAGGGC  
264 GAG

265 *mmps<sup>ΔCterm</sup>* rev:  
266 GATGGAGGGTCTAAAATCGCATATGGGTAGCGGCAGCGGTAGCGTGAGCAAGGGCGAG  
267 GAG

268 *eGFP* fw:  
269 GAGAATCATGCCCAAGGGCCCGGTAGCGGCAGCGGTAGCGTGAGCAAGGGCGAGGAG  
270 CTG

271 *eGFP* rev:  
272 CTCTCGGCATGGACGAGCTGTACAAGTAGGCGGCCCGCTCGAGGGTACCTCTAGAG

273 The *mmps* and *eGFP* sequences were introduced into *pUAST-attB* via Gibson assembly  
274 (ThermoFisher) using *EcoRI* and *XhoI*. To generate transgenic fly lines, *pUAST-attB* constructs  
275 were integrated into *PBac{yellow[+]-attP-9A}VK00024* (Bloomington line #9742) via PhiC31-  
276 mediated recombination (outsourced to Bestgene Inc).

277

## 278 Results

279

### 280 Eb1, Msps/XMAP215 and Tau share the same combination of loss-of-function phenotypes in 281 axons

282 Many candidate regulators have been proposed to regulate MT polymerisation in axons,  
283 comprising factors that are MT plus end-associating, MT shaft-binding or involved in tubulin  
284 provision (Voelzmann et al., 2016). To reveal the core regulatory machinery necessary for  
285 axonal MT polymerisation, we performed a detailed loss-of-function study with a set of  
286 candidate factors using MT polymerisation dynamics and axon length as readouts. Of the pool  
287 of MT plus end-associating factors, we included Eb1, Shot, CLASP/Chb (Chromosome bows)  
288 and the XMAP215 homologue Msps; as MT shaft-binding candidates, we chose Tau and  
289 Map1b/Futsch; to explore the impact of tubulin availability on polymerisation, we used  $\alpha$ 1-  
290 tubulin/*atub84B*, the predominant  $\alpha$ -tubulin expressed in the fly nervous system (FlyAtlas 2,  
291 University of Glasgow, UK; A.V., unpublished) and the tubulin regulator Stathmin (see  
292 Discussion for more details on these factors).

293 To study these candidates, we analysed embryo-derived primary neurons carrying loss-of-  
294 function mutations for the respective genes. To exclude that phenotypes are masked by  
295 maternal contribution (i.e. healthy gene product deposited in the eggs by the heterozygous  
296 mothers), we used additional strategies (Prokop et al., 2012, Sánchez-Soriano et al., 2010):  
297 either we analysed late larval brain-derived primary neurons at 18 HIV (from now on referred to  
298 as larval neurons); if mutants did not reach larval stages, we used embryo-derived neurons that  
299 were kept for 5-7 days in pre-culture to deplete maternal product and then plated and grown for  
300 12 hrs (pre-cultured neurons). In all cases, primary neurons were immuno-stained either for  
301 endogenous tubulin to assess axon length, or for endogenous Eb1 protein to gain a first insight  
302 into the polymerisation state of axonal MTs.

303 Eb1 staining revealed that loss of all factors, except Shot and Futsch, displayed a significant  
304 reduction in the number of plus end comets (Figs. 1A-D, I and 1-S1A). In addition, we measured  
305 the mean intensities and mean lengths of Eb1 comets and used the product of these two

306 parameters to approximate Eb1 amounts at MT plus ends. The strong hypomorphic *Eb1*<sup>04524</sup>  
307 mutant allele is known to display severe, but not complete reduction of protein levels (Elliott et  
308 al., 2005); accordingly, Eb1 amounts at MT plus ends were severely, but not completely  
309 diminished in neurons mutant for this allele (Figs. 1D,J and 1-S1B). Out of the remaining seven  
310 candidate factors, only two further genes showed the same qualitative mutant phenotype:  
311 *msps*<sup>A/A</sup> showed a reduction almost as strong as *Eb1*<sup>04524</sup>, and *tau*<sup>KO/KO</sup> mutant neurons showed  
312 a milder but reliable Eb1 depletion (Fig. 1B,C, J). In all cases, the drop in Eb1 amounts was to  
313 almost equal parts due to reductions in comet length and in intensity (Fig. 1-S2A,B) and, across  
314 all genotypes tested, they correlated well with reduced comet velocities and lifetimes when  
315 assessed in live imaging experiments (using the C-terminal Shot domain Shot-Ctail::GFP as  
316 readout for plus end dynamics; Fig. 1K,L and 1-S2C-E). Our data demonstrate therefore that  
317 similar comet length/velocity correlations made in *in vitro* (Roostalu, Thomas et al., 2020) are  
318 relevant in cellular contexts.

319 To assess whether observed reductions in the number or dynamics of MT plus end comets  
320 correlate with impaired axon growth, we performed tubulin staining and measured axon length.  
321 Out of the eight factors, all but Futsch/MAP1B showed a decrease in axon length ranging  
322 between 10 and 43% when compared to parallel control cultures with wild-type neurons (Figs.  
323 1E-H, M and 1-S1C). In these experiments, a fraction of genotypes showed prominent MT  
324 bundle disintegration where MTs are disorganised and display intertwined, criss-crossing curls  
325 (white arrowheads in Fig. 1F-H). When quantifying these phenotypes using the MT  
326 disorganisation index (MDI; see methods), four of eight candidates showed significant MT  
327 disorganisation including loss of Tau, Msps, Shot and Eb1 (Figs. 1F-H,N and 1-S1D), of which  
328 the latter two confirm previous reports (Alves-Silva et al., 2012).

329 Therefore, out of eight candidate factors assessed with four phenotypic readouts (drop in comet  
330 numbers, reduced Eb1 amounts/dynamics, shorter axons, MT disorganisation), Futsch  
331 deficiency was the only condition showing no obvious defects. In contrast, loss of Eb1, Msps  
332 and Tau stood out by displaying all four phenotypes, of which Tau consistently has a milder  
333 effect. We therefore aimed to understand why these three factors share such a characteristic  
334 combination of phenotypes.

335

### 336 Neuronal Eb1, Msps and Tau are functionally linked and required *in vivo*

337 Next we assessed whether Eb1, Msps and Tau are functionally related. For this, we performed  
338 genetic interaction studies where heterozygous conditions (i.e. one mutant and one normal  
339 copy) of genes are used to reduce their respective protein levels: if reduced protein levels of  
340 different genes combined in the same neurons cause a phenotype, this suggests that they  
341 function in a common pathway. For our studies, we used larval neurons and five different  
342 readouts: axon length (Fig. 2A), MT disorganisation (Fig. 2A'), Eb1 amounts at MT plus ends  
343 (Fig. 2A''), comet numbers (Fig. 2-S1A) and comet dynamics (Fig. 2-S1B).

344 To assess the baseline, we analysed single-heterozygous mutant neurons (*Eb1*<sup>04524/+</sup>, *msps*<sup>A/+</sup>  
345 or *tau*<sup>KO/+</sup>), none of which displayed any phenotypes (Figs. 2A-A'' and 2-S1A,B). However, when  
346 bringing heterozygous conditions of these genes together in the same neurons, certain genetic  
347 combinations displayed significant phenotypes (Fig. 2A'-A'' and 2-S1A,B): *Eb1*<sup>04524/+</sup> *msps*<sup>A/+</sup>  
348 and *tau*<sup>KO/+</sup> *msps*<sup>A/+</sup> double-heterozygous neurons displayed only a mild but significant reduction  
349 in Eb1 amounts at MT plus ends and a trend towards stronger MT disorganisation; the  
350 phenotypes were further enhanced for all five readouts in *Eb1*<sup>04524/+</sup> *msps*<sup>A/+</sup> *tau*<sup>KO/+</sup> triple-  
351 heterozygous neurons. These data suggest that the three factors are functionally linked when



352 regulating MT plus ends, axon growth and MT organisation.

353 The triple-heterozygous condition had a similar effect in fly brains *in vivo*. We could show this  
354 using the T1 subset of medulla neurons in the adult optic lobe which contain prominent axonal  
355 MTs, arranged into tight bundles that can be visualised with  $\alpha$ -tubulin::GFP labelling (Qu et al.,  
356 2019). We found that the axons of T1 medulla neurons from triple-heterozygous mutant adult  
357 flies show a strong increase in areas of MT bundle disorganisation compared to controls, with  
358 MTs becoming unbundled and twisted and axons displaying prominent swellings (Fig.3A-D).  
359 These data strongly suggest that the functional network of Eb1, Msps and Tau is relevant *in*  
360 *vivo*.

361

### 362 The functional unit of Eb1, Msps and Tau is evolutionarily conserved in *Xenopus* neurons

363 In order to evaluate whether the functional network of Eb1, Msps and Tau might be conserved  
364 evolutionarily, we used frog primary neurons. In the frog *Xenopus laevis*, there is only one *tau*  
365 gene (*mapt/microtubule associated protein tau*), *XMAP215* is the only *msps* homologue  
366 (*ckap5/cytoskeleton associated protein 5*), and *EB3* (*mapre3/microtubule associated protein*  
367 *RP/EB family member 3*) is the only one of three *Eb1* homologues that is prominently expressed  
368 in the nervous system (Bowes, Snyder et al., 2009, Karimi, Fortriede et al., 2017). We used  
369 morpholinos against these three genes. Similar to our strategy in *Drosophila*, we analysed MTs  
370 by staining for endogenous tubulin (Fig.3E-E'''), and measured Eb3 comet amounts in live  
371 movies using the Eb protein-binding peptide MACF43-Ctail::GFP as readout (see Methods;  
372 Honnappa et al., 2009, Slater et al., 2019).

373 To approximate heterozygous mutant conditions used in our *Drosophila* experiments, we  
374 adjusted morpholino concentrations to levels that achieved knock-down of each of the three  
375 genes to ~50% (Fig. 3-S1A-B and (Lowery et al., 2013, Slater et al., 2019). Individual knock-  
376 downs to approximately 50% did not cause prominent decreases in MACF43::GFP comet  
377 amounts or increases in MT disorganisation; but when knock-down of all three factors was  
378 combined in the same neurons, we found a reduction in MACF43::GFP comet amounts to 60%  
379 and a 4.8 fold increase in MT disorganisation (Figs. 3E''',F''',G,H and 3-S1C,D).

380 Together, these results suggest that there is functional interaction between the three genes also  
381 in *Xenopus*, and that their operation as a functional unit is evolutionarily conserved. This raises  
382 the question as to what mechanisms can explain the joined function of these proteins.

383

### 384 Eb1, Msps and Tau operate as one functional unit with key roles played by Eb1

385 We next asked whether the three factors are hierarchically and/or interdependently organised  
386 into a functional unit, or whether they regulate the assessed MT properties through independent  
387 parallel mechanisms. To distinguish between these possibilities (Avery & Wasserman, 1992),  
388 we combined homozygous mutant conditions of the three mutant alleles in the same neurons  
389 (*Eb1*<sup>04524/04524</sup> *msps*<sup>A/A</sup> *tau*<sup>KO/KO</sup>) and asked whether this condition enhances phenotypes over  
390 single-homozygous conditions (indicating parallel mechanisms), or whether they show no  
391 further increases (reflecting a functional unit).

392 Since the combined triple-homozygous condition does not survive into the late larval stage, we  
393 used embryonic pre-cultured neurons for these experiments. As reference we used  
394 *Eb1*<sup>04524/04524</sup>, *msps*<sup>A/A</sup> and *tau*<sup>KO/KO</sup> single mutant neurons; since *Eb1*<sup>04524</sup> is a strong but not a  
395 total loss-of-function allele (Elliott et al., 2005), we added neurons homozygous for

396 *Df(2R)Exel6050 (Eb1<sup>Df</sup>)*, a deficiency uncovering the entire *Eb1* locus (see Methods). Of the  
397 four conditions, *Eb1<sup>Df/Df</sup>* neurons showed the strongest phenotypes, thus setting the reference  
398 bar for the triple-homozygous mutant neurons; we found that having the mutations combined  
399 did not enhance the phenotypes beyond that of *Eb1<sup>Df</sup>* (Fig. 2B-B”).

400 These results are consistent with a model where the three proteins act as a functional unit.  
401 Within this unit, the three factors show the same qualitative loss-of-function phenotypes.  
402 However, there is a clear order of severity with *Eb1<sup>Df/Df</sup>* > *msps<sup>1/1</sup>* > *tau<sup>KO/KO</sup>* across all phenotypes  
403 assessed (Figs.2, 2-S1; see Discussion), suggesting that Eb1 is of particular importance within  
404 the functional unit. This is also highlighted when plotting Eb1 amounts against MT  
405 disorganisation from a range of different genetic conditions analysed throughout this study  
406 (Fig.2-S2A). This plot revealed that there is a highly significant inverse correlation between Eb1  
407 comet amounts and MT disorganisation (Figs. 2C and 2-S2), suggesting that Eb1 is the key  
408 factor within the functional unit that mediates to MT bundle promotion.

409

#### 410 Eb1 and Msps depend on each other for MT plus end localisation

411 To understand the functional unit, we next focussed on the mechanistic links between Msps  
412 and Eb1. First we started with co-localisation studies by co-expressing Msps::GFP together with  
413 Eb1::RFP in *Drosophila* embryonic primary neurons. In these experiments, both proteins  
414 prominently localised at the same MT plus ends, with Msps::GFP localising slightly distal to Eb1  
415 (Fig. 4A-A”, Movie M1), as was similarly reported *in vitro* (Maurer, Cade et al., 2014). Their  
416 localisation at the same MT plus ends was even clearer in kymographs of live movies where  
417 both proteins remained closely associated during comet dynamics (Fig.4B,B’).

418 In previous sections we reported that loss of Msps causes severe Eb1 depletion at MT plus  
419 ends (Fig1. 1B, D and 1-S1B), suggesting a requirement of Msps for Eb1's MT plus-end  
420 localisation. We hypothesised that the role of Msps as a tubulin polymerase (Brouhard et al.,  
421 2008) helps to sustain a prominent GTP-tubulin cap as important prerequisite for EB1 binding  
422 (Zanic et al., 2013). In support of this hypothesis, immunostaining for GTP-tubulin in *msps<sup>1</sup>*  
423 mutant neurons revealed length reductions of GTP caps that were as severe as the reduction  
424 observed for Eb1 comets (Figs. 1J vs. 5-S2C). This result together with our finding of reduced  
425 comet velocity in *msps<sup>1</sup>* mutant neurons (Fig. 1K) are consistent with our hypothesis that Msps-  
426 dependent polymerisation increases Eb1 amounts at MT plus ends (see Discussion).

427 Next we investigated whether Eb1 may influence Msps function. We expressed Msps::GFP in  
428 *Eb1<sup>04524</sup>* mutant neurons and found a severe depletion of Msps at growing MT ends when  
429 compared to controls (Fig. 4C, C’; Movies M2 and M3), suggesting that Msps is no longer  
430 efficiently recruited to the plus ends of polymerising MTs. Mechanistically, it was shown *in vitro*  
431 and other cell systems that Msps/XMAP215 can bind MT plus ends independently, but that Eb  
432 proteins can enhance its binding (Maurer et al., 2014, Zanic et al., 2013). Such enhanced Eb  
433 protein-dependent recruitment of Msps/XMAP215 can be mediated by adaptors such as SLAIN  
434 in vertebrates or TACC (Transforming acidic coiled-coil protein) or Sentin in non-neuronal  
435 *Drosophila* cells (Brouhard et al., 2008, Lee, Gergely et al., 2001, Li, Miki et al., 2011, Li et al.,  
436 2012, Lowery et al., 2013, Tang, Rui et al., 2020, van der Vaart, Franker et al., 2012). To test  
437 potential roles of candidate adaptors in fly neurons, we performed functional studies with *tacc<sup>1</sup>*  
438 and *sentin<sup>AB</sup>* loss-of-function mutant alleles. We found that primary neurons carrying these  
439 mutant alleles failed to display axon shortening or MT disorganisation, thus arguing against a  
440 prominent role of these factors to Eb1-dependent Msps recruitment (details in Fig.4-S1A,B). As

441 a complementary approach, we generated a *mmps*<sup>ΔCterm</sup>-GFP construct which lacks the C-  
442 terminal domain essential for the interaction with adaptors (Fig.4D; Fox, Howard et al., 2014,  
443 Mortuza, Cavazza et al., 2014). When *mmps*<sup>ΔCterm</sup>-GFP or *mmps*<sup>FL</sup>-GFP length controls were  
444 transfected into *mmps*<sup>A/146</sup> mutant neurons, we found that both protein variants were similarly  
445 able to improve axon length and MT disorganisation defects, further arguing against the  
446 requirement of adaptors (Fig.4D,D') in fly neurons.

447 In conclusion, our data suggest a scenario where Eb1 and Mps require each other to achieve  
448 prominent MT plus-end localisation. Mps likely maintains Eb1 at MT plus ends through  
449 promoting GTP-cap formation. *Vice versa*, Eb1 facilitates Mps recruitment through a  
450 mechanism that might involve structural maturation of MT plus ends (see Discussion; Maurer  
451 et al., 2014, Zanic et al., 2013).

452

### 453 Tau promotes Eb1 pools at MT plus ends by outcompeting it from lattice binding

454 Similar to Mps, we found that also loss of Tau leads to a reduction of Eb1 comet sizes in both  
455 *Drosophila* (Fig.1C,J and 1-S2A,B) and *Xenopus* neurons (Fig.3-S1G-I). Immuno-histochemical  
456 studies of wild-type fly neurons revealed Tau localisation along MT lattices which does not  
457 extend into the Eb1 comet at the MT plus end (Fig.5A'A''). This distribution is consistent with  
458 reports that Tau has a higher affinity for GDP-tubulin (Castle, McKibben et al., 2020, Duan,  
459 Jonasson et al., 2017) and does suggest that Tau promotes Eb1 plus end localisation through  
460 an indirect mechanisms which does not involve co-localisation.

461 We noticed that the reduction of Eb1 comet sizes in Tau-deficient neurons is accompanied by  
462 a 20% increase in the intensity of Eb1 all along MT lattices (Fig.5C,E for 6 day pre-culture, Fig.5-  
463 S2A for 6HIV). This effect is specific to *tau* and not observed in *mmps*<sup>A/A</sup> mutant neurons (Fig.  
464 5-S2A,B). Tau has previously been shown to protect MTs against Katanin-induced damage  
465 (Qiang, Yu et al., 2006). Therefore, we reasoned that the increase of Eb1 on MT lattices upon  
466 loss of Tau could be a consequence of MT repair mechanisms leading to an increase in GTP-  
467 tubulin along the lattice which could recruit Eb1 (Vemu, Szczesna et al., 2018). However, in  
468 spite of increased Eb1 binding, MT lattices in Tau-deficient neurons did not show obvious  
469 increases in GTP-tubulin (Fig. 5-S1B, D), arguing against the repair hypothesis. In the same  
470 specimens, GTP-tubulin amounts at MT plus ends were clearly reduced, thus mirroring Eb1  
471 comet depletion in Tau deficient neurons (Figs. 1J vs. 5-S1A-C) and suggesting that GTP-  
472 tubulin staining is sufficiently sensitive to make quantitative statements in our model.

473 We next hypothesised that Tau may competitively prevent Eb1 from binding the MT lattice, as  
474 similarly observed for other MAPs (Qiang, Sun et al., 2018). In support of this notion, we found  
475 that low levels of Eb1 localisation along MT lattices observed in wild-type neurons are further  
476 decreased when Tau is over-expressed (Fig. 5-S1E). A similar phenomenon has been observed  
477 *in vitro* with mammalian versions of the two proteins (Ramirez-Rios, Denarier et al., 2016)  
478 suggesting that this mechanism is evolutionarily conserved.

479 We reasoned therefore that MT lattices may turn into a sink for Eb1 if Tau is absent. Given the  
480 high density of MTs in the narrow axons, this aberrant binding could sequester Eb1 pools away  
481 from MT plus ends. To test this possibility, we expressed Eb1::GFP in *tau*<sup>KO/KO</sup> mutant neurons  
482 and stained them with anti-Eb1 antibodies. In support of our hypothesis, these neurons showed  
483 a substantial further increase of Eb1 along MT lattices, but also replenished Eb1 amounts at  
484 MT plus ends (Fig. 5D-F). This treatment was sufficient to suppress Tau-deficient phenotypes,  
485 as reflected in the recovery of Eb1 comet dynamics (improved velocity and lifetime) and strongly

486 reduced MT disorganisation ('Eb1-GFP' in Fig. 5G-I). The latter finding further supports a role  
487 of Eb1 in promoting the bundled conformation of axonal MTs (Fig.2C, Fig.2-S2; see Discussion).

488 Specificity of this mechanism for Tau is demonstrated by parallel experiments expressing  
489 Eb1::GFP in *mmps<sup>Δ/Δ</sup>* mutant neurons which failed to restore their MT plus end dynamics (Fig.  
490 5-S2D,E). This result also provides further important information about the hierarchical  
491 relationships between Eb1, Mmps and Tau within the functional unit (see Discussion). As a  
492 further control, we used Shot-Ctail::GFP (comparable to MACF43::GFP used in *Xenopus*; Figs.  
493 3F and 6A), thus tracking MT plus ends without altering Eb1 levels. When expressing it in  
494 *tau<sup>KO/KO</sup>* mutant neurons, no rescue of MT plus end comet velocity and lifetime was observed  
495 ('Ctail-GFP' in Fig.5G,H).

496 In conclusion, we propose that Tau contributes to MT polymerisation dynamics and MT  
497 organisation in an indirect way through preventing that Eb1 is sequestered away from MT plus  
498 ends. This function of Tau might be particularly important in axons where relative MT densities  
499 are high (Prokop, 2020; see Discussion).

500

#### 501 An Eb1- and spectraplakin-dependent guidance mechanisms explains roles of the functional 502 unit in MT bundle organisation

503 As explained before, Eb1 amounts at MT plus ends inversely correlate with MT disorganisation  
504 (Figs.2C and 2-S2). Observed MT disorganisation in either Eb1-, Mmps- or Tau-deficient  
505 neurons might therefore be a consequence of Eb1 loss from plus ends. We hypothesised that  
506 this phenomenon can be explained through a mechanism involving the *Drosophila* spectraplakin  
507 Shot. Shot has been proposed to link Eb1 at polymerising MT plus ends to cortical F-actin, in  
508 this way guiding the extension of MTs along the axonal surface into parallel bundles.  
509 Accordingly, depletion of either Shot or Eb1 causes MT disorganisation (Alves-Silva et al., 2012,  
510 Voelzmann, Liew et al., 2017; Fig.6F).

511 In support of this guidance hypothesis, we found that severe MT disorganisation observed in  
512 *Eb1<sup>+/-</sup> mmps<sup>+/-</sup> tau<sup>+/-</sup>* triple-heterozygous mutant neurons (which have reduced Eb1 comet  
513 amounts; Fig.2A'') was significantly improved from 7.3-fold (with GFP-expression) to 1.4-fold  
514 when over-expressing full length Shot-FL::GFP (Fig.6B-C; both compared to wild-type controls).

515 To exclude that this rescue is mediated through different Shot-dependent mechanisms, in  
516 particular its role in MT stabilisation (Voelzmann et al., 2017), we repeated these experiments  
517 with Shot versions that maintain MT-stabilising activity but affect actin-Eb1 cross-linkage in two  
518 specific ways: (1) Shot<sup>ΔABD</sup>::GFP lacks the N-terminal calponin homology domain required for  
519 interaction with the actin cortex; (2) Shot<sup>3MTLS</sup>::GFP carries mutations in the C-terminal SxIP  
520 motifs required for the specific binding to Eb1 (Fig. 6A and F; see also Fig. 7A). Both Shot  
521 variants failed to rescue MT disorganisation in *Eb1<sup>04524/+</sup> mmps<sup>1/+</sup> tau<sup>KO/+</sup>* triple-heterozygous  
522 mutant neurons (Fig.6B,C), consistent with a model where where Shot guides MTs downstream  
523 of Eb1 through cross-linking it to cortical F-actin. This conclusion is further supported by the  
524 finding that MT disorganisation observed in *Eb1<sup>04524/04524</sup>* mutant neurons is not further  
525 enhanced in *Eb1<sup>04524/04524</sup> shot<sup>3/3</sup>* double-mutant neurons (Figs. 6D, E).

526 We conclude that the polymerisation-promoting functional unit of Eb1, Mmps and Tau appears  
527 to act through Shot-mediated MT guidance downstream of Eb1 to perform its function in axonal  
528 bundle organisation, as a key mechanism contributing to the formation and long-term  
529 maintenance of axons.

530

531 **Discussion**

532

533 New understanding of the role and regulation of MT polymerisation and guidance in axons

534 Understanding the machinery of MT polymerisation is of utmost importance in axons where MTs  
535 form loose bundles of enormous lengths which are essential for axonal morphogenesis and  
536 serve as life-sustaining transport highways (Prokop, 2020). They have to be maintained in  
537 functional state for up to a century in humans (Hahn et al., 2019). For this, MT polymerisation  
538 is required to generate new MTs, or to repair or replace them. The underpinning machinery is  
539 expected to be complex (Voelzmann et al., 2016), but its understanding will deliver new  
540 strategies for tackling developmental and degenerative axon pathologies.

541 Here we made important advances to this end. Having screened through 13 candidates (here  
542 and (Beaven et al., 2015), we found the three factors Eb1, Msps and Tau to stand out by  
543 expressing the same combination of phenotypes, and displaying strong functional interaction in  
544 *Drosophila* that is conserved in *Xenopus* neurons. We found that this machinery is not only  
545 important to maintain MT mass by driving polymerisation, but also for arranging MTs into  
546 bundles, thus highlighting MT polymerisation as a doubly important process for axon formation  
547 and maintenance.

548 Through carrying out this work in fly, we were able to demonstrate that the functional  
549 collaboration of the three factors is relevant *in vivo* and gain an understanding of the underlying  
550 mechanisms, both with respect to promoting MT polymerisation and their arrangement into  
551 parallel bundles (see details in Fig.7 and below).

552 Our mechanistic models are strongly supported by published data obtained through *in vitro*  
553 studies of MTs that match extremely well with virtually all our findings. Key examples are: (1)  
554 the complementary binding preferences of EB1 and Tau for GTP-/GDP-tubulin (Castle et al.,  
555 2020, Zanic, Stear et al., 2009); (2) the mutual enhancement of Eb1 and XMAP215/Msps  
556 originally suggested in *Xenopus* extracts and then demonstrated in reconstitution essays with  
557 purified proteins from fly and vertebrates (Kronja, Kruljac-Letunic et al., 2009, Li et al., 2012,  
558 Zanic et al., 2013); (3) the correlation of GTP cap size with comet velocity (Roostalu et al.,  
559 2020); (4) the reduction of comet numbers but not dynamics (Fig.1-S1) upon depletion of  $\alpha$ 1-  
560 tubulin or Stathmin (a prominent regulator of tubulin availability; Duncan et al., 2013, Manna,  
561 Grenningloh et al., 2007) which are consistent with *in vitro* observations that MT nucleation is  
562 far more sensitive to tubulin levels than polymerisation (Consolati, Locke et al., 2020). This list  
563 of similarities is in stark support of our model and a clear indication that many *in vitro* observation  
564 seem to apply in cellular contexts.

565 In the following we will discuss a mechanistic model (summarised in Fig.7) able to coherently  
566 integrate our experimental findings in neurons with current knowledge obtained from *in vitro*  
567 studies.

568 Eb1 and XMAP215/Msps are core factors promoting MT polymerisation and guidance

569 At the core of this model lie Eb1 and XMap215/Msps. Of these, vertebrate XMAP215 and fly  
570 Msps are both known to be relevant for neuronal morphogenesis in fly and *Xenopus* (Lowery et  
571 al., 2013, Tang et al., 2020). Work in non-neuronal cells or *in vitro* have shown that Msps and  
572 XMAP215 both strongly enhance MT polymerisation, consistent with expected functions of this  
573 TOG-domain protein as a polymerase (Al-Bassam & Chang, 2011, Brouhard et al., 2008, Fox

574 et al., 2014, Howard & Hyman, 2009, Li et al., 2012, Zanic et al., 2013).

575 Eb1 is a known scaffold (Akhmanova & Steinmetz, 2015) and, accordingly, both *Drosophila* and  
576 vertebrate Eb1 seem to be only moderate promoters of MT polymerisation *in vitro* (Li et al.,  
577 2012, Ramirez-Rios et al., 2016, Zanic et al., 2013) and references within). Conserved binding  
578 partners of Eb proteins are the spectraplakins that can guide extending MT plus ends by cross-  
579 linking them to actin, relevant for MT guidance in axons and non-neuronal cells (Alves-Silva et  
580 al., 2012, Voelzmann et al., 2017, Wu, Kodama et al., 2008). Although spectraplakins might not  
581 be the only interactors involved in Eb1-dependent axonal MT guidance (Hahn et al., 2019), their  
582 contribution is prominent and our data clearly support this role of Shot (Fig.7E,E').

583 Taken together, it seems therefore reasonable to assume that, within the functional unit, Msps  
584 is the key promoter of polymerisation, and Eb1 the key mediator of MT guidance into bundles  
585 (Fig.7A,A'). However, to perform these functions, both factors have to be enriched in sufficient  
586 amounts at MT plus ends. For this, both proteins depend on each other: taking out Eb1 detaches  
587 not only Shot thus abolishing guidance, but also negatively impacts Msps localisation hence  
588 polymerisation (Fig.7B,B'); the same is true in reverse when removing Msps (Fig.7C,C') and  
589 may explain why loss of XMAP215 was reported to affect MT guidance in growth cones of frog  
590 neurons (Slater et al., 2019).

591 This mutual dependency is unlikely to involve their physical interaction, since MT plus end  
592 localisation of Eb1 is known to occur tens of nanometres behind XMAP215 (Maurer et al., 2014,  
593 Zanic et al., 2013). Furthermore, as detailed in the Results part, our data do not support an  
594 obvious role of adaptors in mediating Eb1- XMAP215 interactions (Figs.4D-D'' and 4-S1). This  
595 deviates from other cellular contexts in which EB1 adaptors are required for Msps/XMAP215  
596 MT plus end localisation (Lee et al., 2001, Li et al., 2011, Li et al., 2012, Nwagbara, Faris et al.,  
597 2014, Tang et al., 2020, van der Vaart et al., 2012), potentially reflecting context-specific  
598 variations in MT regulation; this has similarly been reported for the plus end-associating factor  
599 Clip170/190 which fails to form comets in axons of fly and mouse neurons (Beaven et al., 2015).

600 Instead, indirect mechanisms for mutual dependency of Eb1 and XMAP215/Msps were  
601 proposed in the context of *in vitro* studies: through promoting MT polymerisation, XMAP215  
602 maintains a prominent GTP-cap thus enabling the binding of substantial amounts of Eb1  
603 molecules (Maurer et al., 2014, Zanic et al., 2013). Restricted GTP-cap formation as a limiting  
604 factor for Eb1 binding would also explain why Eb1 over-expression fails to rescue Msps-  
605 deficient phenotypes (Fig.5-S2D-F). *Vice versa*, it was suggested that Eb1's ability to promote  
606 lateral protofilament contacts could assist in sheet formation at the very plus tip, thus facilitating  
607 the binding of XMAP215/Msps (Maurer et al., 2014, Zanic et al., 2013). We believe this  
608 mechanism to be the most likely to explain our findings.

609

#### 610 Tau contributes through an indirect mechanism of competitive binding to MT lattices

611 Tau and Map1b/Futsch are known to promote MT polymerisation *in vitro* and axon growth in  
612 mouse and fly neurons through mechanisms that remain unclear (Brandt & Lee, 1993, Caceres  
613 & Kosik, 1990, Cleveland, Hwo et al., 1977, DiTella, Feiguin et al., 1996, Drechsel et al., 1992,  
614 Hummel et al., 2000, Kadavath, Hofele et al., 2015, Kiris, Ventimiglia et al., 2010, Levy, Leboeuf  
615 et al., 2005, Liu et al., 2015, Panda, Goode et al., 1995, Ramirez-Rios et al., 2016, Takei, Teng  
616 et al., 2000, Tymanskyj, Scales et al., 2012, Villarroel-Campos & Gonzalez-Billault, 2014).

617 In our cellular model, loss of Map1b/Futsch has no obvious effects, whereas Tau shares a  
618 surprising number of loss-of-function mutant phenotypes with those of Msps and Eb1. At least

619 one of these, loss of Eb proteins from MT plus ends, appears an evolutionarily well conserved  
620 phenomenon observed in fly neurons (Figs.1C,J), frog neurons (Fig.3-S1G-I), N1E-115 mouse  
621 neuroblastoma cells and primary mouse cortical neurons (Sayas, Tortosa et al., 2015). Sayas  
622 and co-workers originally reported also tau-mediated recruitment of Eb proteins to the MT lattice  
623 (analogous to MAP2-mediated Eb3 recruitment to MTs in dendrites; Kapitein, Yau et al., 2011).  
624 However, their subsequent *in vitro* work suggested that Tau outcompetes Eb1 at the lattice and  
625 Eb proteins outcompete Tau at MT plus ends (Ramirez-Rios et al., 2016), potentially involving  
626 sequestration through direct interaction in the cytoplasm - as would be consistent with other  
627 reports that Tau can bind Eb1 (Buey, Mohan et al., 2011, Duan et al., 2017).

628 We do not argue against such interaction and that it can potentially contribute to Eb protein loss  
629 from MT plus ends when tau is over-expressed (Ramirez-Rios et al., 2016); but it cannot explain  
630 why Eb1 comets are reduced when Tau is absent. Instead, the mechanism we propose is  
631 based on the known complementary binding preferences of Eb1 and Tau for GTP-/GDP-tubulin  
632 (Castle et al., 2020, Duan et al., 2017, Zanic et al., 2009). Thus, we find that Tau binds  
633 preferentially along MT shafts but not at plus ends, whereas Eb1 binds in complementary  
634 fashion and displays elevated shaft binding when Tau is absent (Fig.5C and 7D'). Such  
635 competitive binding behaviour is reminiscent of Tau's role in preventing MAP6 from binding in  
636 certain regions of the MT lattice (Baas & Qiang, 2019, Qiang et al., 2018); it is in agreement  
637 with the idea of a MAP code where similar MAP competition is assumed to regulate region-  
638 specific axonal transport (Monroy, Tan et al., 2020).

639 Given the high density of MTs in the narrow space of axons, we propose that lattice binding can  
640 generate a sink large enough to reduce Eb1 levels at MT plus ends, and our rescue experiments  
641 with Eb1::GFP overexpression strongly support this notion. In this way, loss of Tau generates  
642 a condition comparable to a modest Eb1 loss-of-function mutant phenotype, thus explaining  
643 why Tau shares its repertoire of loss-of-function phenotypes with Msps and Eb1 but with lower  
644 penetrance.

645 We propose that similar mechanisms might operate in smaller diameter axons in vertebrates,  
646 such as in parallel fibres of the cerebellum where Tau has demonstrated structural roles  
647 (Harada, Oguchi et al., 1994); they might explain the aforementioned findings of small Eb protein  
648 comets in cultured vertebrate neurons, as well as the reduction in MT numbers observed upon  
649 loss of Tau in *C. elegans* (Krieg, Stühmer et al., 2017). However, in larger diameter axons of  
650 vertebrates where MT densities are low (Prokop, 2020), the Eb1 depletion effect might be far  
651 less noticeable.

652

### 653 Main conclusions and future perspectives

654 Here we have gained new understanding of MT polymerisation regulation in axons and have  
655 been able to propose a solid and consistent mechanistic model. This model aligns well with  
656 known *in vitro* data and our previous mechanistic models explaining Eb1/Shot-mediated MT  
657 guidance (Alves-Silva et al., 2012) and complementary functions of Shot and the cortical  
658 collapse factor Efa6 (Qu et al., 2019).

659 Developing such refined mechanistic models of increasing complexity is made possible through  
660 using one standardised *Drosophila* neuron system amenable to combinatorial genetic  
661 approaches - with enormous capacity to extend our understanding even further to other factors  
662 known to regulate MT polymerisation *in vitro* (Zanic et al., 2013). Gaining an understanding of  
663 the machinery regulating axonal MT polymerisation opens up new ways to investigate the

664 mechanisms behind other important observations, such as the finding that cortical actin has a  
665 regulatory impact on MT polymerisation in axons (Qu et al., 2017).

666 As another example, we found that loss of either Eb1, XMAP215/Msps or Tau all caused a  
667 reduction in comet numbers, potentially reflecting changes in MT nucleation activity, consistent  
668 with reports of nucleation-promoting roles of XMAP215 (Flor-Parra, Iglesias-Romero et al.,  
669 2018, Roostalu, Cade et al., 2015, Thawani, Kadzik et al., 2018, Wieczorek, Bechstedt et al.,  
670 2015). Extending work from MT polymerisation to nucleation is possible in the fly system and  
671 would have the potential to deliver explanations for how numbers of MTs can be regulated in  
672 reproducible, neuron-specific ways, thus addressing a fundamental aspect of axon morphology  
673 (Prokop, 2020).

674 By gradually assembling molecular mechanisms into regulatory networks that can explain  
675 axonal MT regulation at the cellular level, our studies come closer to explaining axonal  
676 pathologies which can then form the basis for the development of remedial strategies (Hahn et  
677 al., 2019).

678

## 679 **Acknowledgements**

680 This work was made possible through support by the BBSRC to A.P (BB/I002448/1,  
681 BB/P020151/1, BB/L000717/1, BB/M007553/1) to N.S.S. (BB/M007456/1, BB/R018960/1), by  
682 the Leverhulme Trust to I.H. (ECF-2017-247), by the German Research Council (DFG) to A.V.  
683 (VO 2071/1-1), by NIH to L.A.L (R01 MH109651), and a postdoctoral fellowship from CONICYT  
684 to P.G.S. The Manchester Bioimaging Facility microscopes used in this study were purchased  
685 with grants from the BBSRC, The Wellcome Trust and The University of Manchester Strategic  
686 Fund. The Fly Facility has been supported by funds from The University of Manchester and the  
687 Wellcome Trust (087742/Z/08/Z). We thank Hiro Ohkura for kindly providing DmEb1 antibody  
688 and unpublished mutant alleles of *msps*. Stocks obtained from the Bloomington *Drosophila*  
689 Stock Center (NIH P40OD018537) were used in this study.

690

## 691 **References**

- 692 Adalbert R, Coleman MP (2012) Axon pathology in age-related neurodegenerative disorders.  
693 *Neuropathol Appl Neurobiol* 39: 90–108
- 694 Aher A, Rai D, Schaedel L, Gaillard J, John K, Liu Q, Altelaar M, Blanchoin L, They M,  
695 Akhmanova A (2020) CLASP mediates microtubule repair by restricting lattice damage and  
696 regulating tubulin incorporation. *Current Biology*
- 697 Akhmanova A, Steinmetz MO (2015) Control of microtubule organization and dynamics: two  
698 ends in the limelight. *Nat Rev Mol Cell Biol* 16: 711–726
- 699 Al-Bassam J, Chang F (2011) Regulation of microtubule dynamics by TOG-domain proteins  
700 XMAP215/Dis1 and CLASP. *Trends Cell Biol* 21: 604-14
- 701 Al-Bassam J, Kim H, Brouhard G, van Oijen A, Harrison SC, Chang F (2010) CLASP promotes  
702 microtubule rescue by recruiting tubulin dimers to the microtubule. *Dev Cell* 19: 245-58
- 703 Alves-Silva J, Sánchez-Soriano N, Beaven R, Klein M, Parkin J, Millard T, Bellen H, Venken  
704 KJT, Ballestrem C, Kammerer RA, Prokop A (2012) Spectraplakins promote microtubule-  
705 mediated axonal growth by functioning as structural microtubule-associated proteins and  
706 EB1-dependent +TIPs (Tip Interacting Proteins). *J Neurosci* 32: 9143-58
- 707 Avery L, Wasserman S (1992) Ordering gene function: the interpretation of epistasis in  
708 regulatory hierarchies. *Trends Genet* 8: 312-316



- 709 Baas PW, Qiang L (2019) Tau: it's not what you think. *Trends Cell Biol* 29: 452-461
- 710 Beaven R, Dzhindzhev NS, Qu Y, Hahn I, Dajas-Bailador F, Ohkura H, Prokop A (2015)
- 711 *Drosophila* CLIP-190 and mammalian CLIP-170 display reduced microtubule plus end
- 712 association in the nervous system. *Mol Biol Cell* 26: 1491-508
- 713 Bowes JB, Snyder KA, Segerdell E, Jarabek CJ, Azam K, Zorn AM, Vize PD (2009) Xenbase:
- 714 gene expression and improved integration. *Nucleic Acids Research* 38: D607-D612
- 715 Brandt R, Lee G (1993) The balance between tau protein's microtubule growth and nucleation
- 716 activities: implications for the formation of axonal microtubules. *J Neurochem* 61: 997-1005
- 717 Brittle AL, Ohkura H (2005) Mini spindles, the XMAP215 homologue, suppresses pausing of
- 718 interphase microtubules in *Drosophila*. *EMBO J* 24: 1387-96
- 719 Brouhard GJ, Stear JH, Noetzel TL, Al-Bassam J, Kinoshita K, Harrison SC, Howard J, Hyman
- 720 AA (2008) XMAP215 is a processive microtubule polymerase. *Cell* 132: 79-88
- 721 Buey RM, Mohan R, Leslie K, Walzthoeni T, Missimer JH, Menzel A, Bjelic S, Bargsten K,
- 722 Grigoriev I, Smal I, Meijering E, Aebersold R, Akhmanova A, Steinmetz MO (2011) Insights
- 723 into EB1 structure and the role of its C-terminal domain for discriminating microtubule tips
- 724 from the lattice. *Mol Biol Cell* 22: 2912-23
- 725 Burnouf S, Gronke S, Augustin H, Dols J, Gorsky MK, Werner J, Kerr F, Alic N, Martinez P,
- 726 Partridge L (2016) Deletion of endogenous Tau proteins is not detrimental in *Drosophila*. *Sci*
- 727 *Rep* 6: 23102
- 728 Caceres A, Kosik KS (1990) Inhibition of neurite polarity by tau antisense oligonucleotides in
- 729 primary cerebellar neurons. *Nature* 343: 461-3
- 730 Calkins DJ (2013) Age-Related Changes in the Visual Pathways: Blame It on the AxonAge-
- 731 Related Changes in the Visual Pathways. *Invest Ophthalmol Vis Sci* 54: ORSF 37-41
- 732 Castle BT, McKibben KM, Rhoades E, Odde DJ (2020) Tau avoids the GTP cap at growing
- 733 microtubule plus ends. *bioRxiv*: 2019.12.31.891234
- 734 Cleveland DW, Hwo SY, Kirschner MW (1977) Purification of tau, a microtubule-associated
- 735 protein that induces assembly of microtubules from purified tubulin. *J Mol Biol* 116: 207-25
- 736 Consolati T, Locke J, Roostalu J, Chen ZA, Gannon J, Asthana J, Lim WM, Martino F, Cvetkovic
- 737 MA, Rappsilber J, Costa A, Surrey T (2020) Microtubule Nucleation Properties of Single
- 738 Human  $\gamma$ TuRCs Explained by Their Cryo-EM Structure. *Developmental Cell* 53: 603-617.e8
- 739 Dimitrov A, Quesnoit MI, Moutel S, Cantaloube I, Po?s C, Perez F (2008) Detection of GTP-
- 740 tubulin conformation *in vivo* reveals a role for GTP remnants in microtubule rescues. *Science*
- 741 322: 1353-1356
- 742 DiTella MC, Feiguin F, Carri N, Kosik KS, Caceres A (1996) MAP-1B/TAU functional
- 743 redundancy during laminin-enhanced axonal growth. *J Cell Sci* 109 ( Pt 2): 467-77
- 744 Doerflinger H, Benton R, Shulman JM, St Johnston D (2003) The role of PAR-1 in regulating
- 745 the polarised microtubule cytoskeleton in the *Drosophila* follicular epithelium. *Development*
- 746 130: 3965-75
- 747 Drechsel DN, Hyman AA, Cobb MH, Kirschner MW (1992) Modulation of the dynamic instability
- 748 of tubulin assembly by the microtubule-associated protein tau. *Mol Biol Cell* 3: 1141-54
- 749 Duan AR, Jonasson EM, Alberico EO, Li C, Scripture JP, Miller RA, Alber MS, Goodson HV
- 750 (2017) Interactions between tau and different conformations of tubulin: implications for tau
- 751 function and mechanism. *J Mol Biol* 429: 1424-1438
- 752 Duncan IW, Kaufman TC (1975) Cytogenic analysis of chromosome 3 in *Drosophila*
- 753 *melanogaster*: mapping of the proximal portion of the right arm. *Genetics* 80: 733-52
- 754 Duncan JE, Lytle NK, Zuniga A, Goldstein LS (2013) The microtubule regulatory protein
- 755 Stathmin is required to maintain the integrity of axonal microtubules in *Drosophila*. *PLoS One*
- 756 8: e68324

- 757 Elliott SL, Cullen CF, Wrobel N, Kernan MJ, Ohkura H (2005) EB1 is essential during *Drosophila*  
758 development and plays a crucial role in the integrity of chordotonal mechanosensory organs.  
759 *Mol Biol Cell* 16: 891-901
- 760 Flor-Parra I, Iglesias-Romero AB, Chang F (2018) The XMAP215 ortholog Alp14 promotes  
761 microtubule nucleation in fission yeast. *Curr Biol* 28: 1681-1691.e4
- 762 Fox JC, Howard AE, Currie JD, Rogers SL, Slep KC (2014) The XMAP215 family drives  
763 microtubule polymerization using a structurally diverse TOG array. *Mol Biol Cell* 25: 2375-92
- 764 Gasic I, Mitchison TJ (2019) Autoregulation and repair in microtubule homeostasis. *Curr Opin*  
765 *Cell Biol* 56: 80-87
- 766 Gergely F, Kidd D, Jeffers K, Wakefield JG, Raff JW (2000) D-TACC: a novel centrosomal  
767 protein required for normal spindle function in the early *Drosophila* embryo. *EMBO J* 19: 241-  
768 52
- 769 Gluszek AA, Cullen CF, Li W, Battaglia RA, Radford SJ, Costa MF, McKim KS, Goshima G,  
770 Ohkura H (2015) The microtubule catastrophe promoter Sentin delays stable kinetochore-  
771 microtubule attachment in oocytes. *J Cell Biol* 211: 1113-20
- 772 Grieder NC, de Cuevas M, Spradling AC (2000) The fusome organizes the microtubule network  
773 during oocyte differentiation in *Drosophila*. *Development* 127: 4253-4264
- 774 Hahn I, Voelzmann A, Liew Y-T, Costa-Gomes B, Prokop A (2019) The model of local axon  
775 homeostasis - explaining the role and regulation of microtubule bundles in axon maintenance  
776 and pathology *Neural Dev* 14: 10.1186/s13064-019-0134-0
- 777 Harada A, Oguchi K, Okabe S, Kuno J, Terada S, Ohshima T, Sato-Yoshitake R, Takei Y, Noda  
778 T, Hirokawa N (1994) Altered microtubule organization in small-calibre axons of mice lacking  
779 tau protein. *Nature* 369: 488-91
- 780 Honnappa S, Gouveia SM, Weisbrich A, Damberger FF, Bhavesh NS, Jawhari H, Grigoriev I,  
781 van Rijssel FJ, Buey RM, Lawera A, Jelesarov I, Winkler FK, Wuthrich K, Akhmanova A,  
782 Steinmetz MO (2009) An EB1-binding motif acts as a microtubule tip localization signal. *Cell*  
783 138: 366-76
- 784 Howard J, Hyman AA (2009) Growth, fluctuation and switching at microtubule plus ends. *Nat*  
785 *Rev Mol Cell Biol* 10: 569-74
- 786 Hummel T, Krukkert K, Roos J, Davis G, Klämbt C (2000) *Drosophila* Futsch/22C10 is a  
787 MAP1B-like protein required for dendritic and axonal development. *Neuron* 26: 357-370
- 788 Inoue YH, do Carmo Avides M, Shiraki M, Deak P, Yamaguchi M, Nishimoto Y, Matsukage A,  
789 Glover DM (2000) Orbit, a novel microtubule-associated protein essential for mitosis in  
790 *Drosophila melanogaster*. *J Cell Biol* 149: 153-66
- 791 Jenkins BV, Saunders HAJ, Record HL, Johnson-Schlitz DM, Wildonger J (2017) Effects of  
792 mutating alpha-tubulin lysine 40 on sensory dendrite development. *J Cell Sci* 130: 4120-4131
- 793 Kadavath H, Hofele RV, Biernat J, Kumar S, Tepper K, Urlaub H, Mandelkow E, Zweckstetter  
794 M (2015) Tau stabilizes microtubules by binding at the interface between tubulin  
795 heterodimers. *Proc Natl Acad Sci* 112: 7501-7506
- 796 Kapitein LC, Yau KW, Gouveia SM, van der Zwan WA, Wulf PS, Keijzer N, Demmers J,  
797 Jaworski J, Akhmanova A, Hoogenraad CC (2011) NMDA receptor activation suppresses  
798 microtubule growth and spine entry. *J Neurosci* 31: 8194-209
- 799 Karimi K, Fortriede JD, Lotay VS, Burns KA, Wang DZ, Fisher ME, Pells TJ, James-Zorn C,  
800 Wang Y, Ponferrada V G, Chu S, Chaturvedi P, Zorn AM, Vize PD (2017) Xenbase: a  
801 genomic, epigenomic and transcriptomic model organism database. *Nucleic Acids Res* 46:  
802 D861-D868
- 803 Kiris E, Ventimiglia D, Feinstein SC (2010) Quantitative analysis of MAP-mediated regulation of  
804 microtubule dynamic instability in vitro focus on Tau. *Methods Cell Biol* 95: 481-503
- 805 Kolodziej PA, Jan LY, Jan YN (1995) Mutations that affect the length, fasciculation, or ventral  
806 orientation of specific sensory axons in the *Drosophila* embryo. *Neuron* 15: 273-286

- 807 Krieg M, Stühmer J, Cueva JG, Fetter R, Spilker K, Cremers D, Shen K, Dunn AR, Goodman  
808 MB (2017) Genetic defects in  $\beta$ -spectrin and tau sensitize *C. elegans* axons to movement-  
809 induced damage via torque-tension coupling. *Elife* 6: e20172
- 810 Kronja I, Kruljac-Letunic A, Caudron-Herger M, Bieling P, Karsenti E (2009) XMAP215-EB1  
811 interaction is required for proper spindle assembly and chromosome segregation in *Xenopus*  
812 egg extract. *Mol Biol Cell* 20: 2684-96
- 813 Lee MJ, Gergely F, Jeffers K, Peak-Chew SY, Raff JW (2001) Msps/XMAP215 interacts with  
814 the centrosomal protein D-TACC to regulate microtubule behaviour. *Nat Cell Biol* 3: 643-9
- 815 Levy SF, Leboeuf AC, Massie MR, Jordan MA, Wilson L, Feinstein SC (2005) Three- and four-  
816 repeat tau regulate the dynamic instability of two distinct microtubule subpopulations in  
817 qualitatively different manners. Implications for neurodegeneration. *J Biol Chem* 280: 13520-  
818 8
- 819 Li W, Miki T, Watanabe T, Kakeno M, Sugiyama I, Kaibuchi K, Goshima G (2011) EB1 promotes  
820 microtubule dynamics by recruiting Sentin in *Drosophila* cells. *J Cell Biol* 193: 973-83
- 821 Li W, Moriwaki T, Tani T, Watanabe T, Kaibuchi K, Goshima G (2012) Reconstitution of dynamic  
822 microtubules with *Drosophila* XMAP215, EB1, and Sentin. *J Cell Biol* 199: 849-62
- 823 Liu Y, Wang C, Destin G, Szaro BG (2015) Microtubule-associated protein tau promotes  
824 neuronal class II beta-tubulin microtubule formation and axon elongation in embryonic  
825 *Xenopus laevis*. *Eur J Neurosci* 41: 1263-75
- 826 Lowery LA, Faris AER, Stout A, Van Vactor D (2012) Neural explant cultures from *Xenopus*  
827 *laevis*. *JoVE*: e4232
- 828 Lowery LA, Stout A, Faris AE, Ding L, Baird MA, Davidson MW, Danuser G, Van Vactor D  
829 (2013) Growth cone-specific functions of XMAP215 in restricting microtubule dynamics and  
830 promoting axonal outgrowth. *Neural Dev* 8: 22
- 831 Luo L, Liao YJ, Jan LY, Jan YN (1994) Distinct morphogenetic functions of similar small  
832 GTPases: *Drosophila* Drac1 is involved in axonal outgrowth and myoblast fusion. *Genes Dev*  
833 8: 1787-1802
- 834 Manna T, Grenningloh G, Miller HP, Wilson L (2007) Stathmin family protein SCG10  
835 differentially regulates the plus and minus end dynamics of microtubules at steady state *in*  
836 *vitro*: implications for its role in neurite outgrowth. *Biochemistry* 46: 3543-52
- 837 Manna T, Thrower DA, Honnappa S, Steinmetz MO, Wilson L (2009) Regulation of microtubule  
838 dynamic instability *in vitro* by differentially phosphorylated stathmin. *J Biol Chem* 284: 15640-  
839 9
- 840 Marner L, Nyengaard JR, Tang Y, Pakkenberg B (2003) Marked loss of myelinated nerve fibers  
841 in the human brain with age. *J Comp Neurol* 462: 144-52
- 842 Maurer SP, Cade NI, Bohner G, Gustafsson N, Boutant E, Surrey T (2014) EB1 accelerates two  
843 conformational transitions important for microtubule maturation and dynamics. *Curr Biol* 24:  
844 372-84
- 845 Monroy BY, Tan TC, Oclaman JM, Han JS, Simó S, Niwa S, Nowakowski DW, McKenney RJ,  
846 Ori-McKenney KM (2020) A combinatorial MAP code dictates polarized microtubule  
847 transport. *Dev Cell* 53
- 848 Mortuza GB, Cavazza T, Garcia-Mayoral MF, Hermida D, Peset I, Pedrero JG, Merino N, Blanco  
849 FJ, Lyngsø J, Bruix M, Pedersen JS, Vernos I, Montoya G (2014) XTACC3–XMAP215  
850 association reveals an asymmetric interaction promoting microtubule elongation. *Nature*  
851 *Communications* 5: 5072
- 852 Nieuwkoop, J. F (1994) *Normal table of Xenopus laevis (Daudin): A systematical and*  
853 *chronological survey of the development from the fertilized egg till the end of metamorphosis.*  
854 Garland Pub. Inc. , New York
- 855 Nwagbara BU, Faris AE, Bearce EA, Erdogan B, Ebbert PT, Evans MF, Rutherford EL,  
856 Enzenbacher TB, Lowery LA (2014) TACC3 is a microtubule plus-end tracking protein that

- 857 promotes axon elongation and also regulates microtubule plus-end dynamics in multiple  
858 embryonic cell types. *Mol Biol Cell*
- 859 O'Neill EM, Rebay I, Tjian R, Rubin GM (1994) The activities of two Ets-related transcription  
860 factors required for Drosophila eye development are modulated by the Ras/MAPK pathway.  
861 *Cell* 78: 137-47.
- 862 Panda D, Goode BL, Feinstein SC, Wilson L (1995) Kinetic stabilization of microtubule  
863 dynamics at steady state by tau and microtubule-binding domains of tau. *Biochemistry* 34:  
864 11117-27
- 865 Prokop A (2013) A rough guide to Drosophila mating schemes. *figshare*:  
866 [dx.doi.org/10.6084/m9.figshare.106631](https://doi.org/10.6084/m9.figshare.106631)
- 867 Prokop A (2020) Cytoskeletal organization of axons in vertebrates and invertebrates. *J Cell Biol*  
868 219: e201912081
- 869 Prokop A, Beaven R, Qu Y, Sánchez-Soriano N (2013) Using fly genetics to dissect the  
870 cytoskeletal machinery of neurons during axonal growth and maintenance. *J Cell Sci* 126:  
871 2331-41
- 872 Prokop A, Küppers-Munther B, Sánchez-Soriano N (2012) Using primary neuron cultures of  
873 Drosophila to analyse neuronal circuit formation and function. *The making and un-making of*  
874 *neuronal circuits in Drosophila* 69: 225-47
- 875 Prokop A, Meinertzhagen IA (2006) Development and structure of synaptic contacts in  
876 Drosophila. *Semin Cell Dev Biol* 17: 20-30
- 877 Qiang L, Sun X, Austin TO, Muralidharan H, Jean DC, Liu M, Yu W, Baas PW (2018) Tau does  
878 not stabilize axonal microtubules but rather enables them to have long labile domains. *Curr*  
879 *Biol* 28: 2181-2189 e4
- 880 Qiang L, Yu W, Andreadis A, Luo M, Baas PW (2006) Tau protects microtubules in the axon  
881 from severing by katanin. *J Neurosci* 26: 3120-9
- 882 Qu Y (2015) Novel concepts of microtubule regulation during axon growth and maintenance.  
883 *Faculty of Life Sciences PhD*: 205
- 884 Qu Y, Hahn I, Lees M, Parkin J, Voelzmann A, Dorey K, Rathbone A, Friel C, Allan V, Okenve  
885 Ramos P, Sánchez-Soriano N, Prokop A (2019) Efa6 protects axons and regulates their  
886 growth and branching by inhibiting microtubule polymerisation at the cortex. *eLife* 8: e50319
- 887 Qu Y, Hahn I, Webb SED, Pearce SP, Prokop A (2017) Periodic actin structures in neuronal  
888 axons are required to maintain microtubules. *Mol Biol Cell* 28 296-308
- 889 Ramirez-Rios S, Denarier E, Prezel E, Vinit A, Stoppin-Mellet V, Devred F, Barbier P, Peyrot V,  
890 Sayas CL, Avila J, Peris L, Andrieux A, Serre L, Fourest-Lieuvin A, Arnal I (2016) Tau  
891 antagonizes end-binding protein tracking at microtubule ends through a phosphorylation-  
892 dependent mechanism. *Mol Biol Cell* 27: 2924-2934
- 893 Rogers SL, Rogers GC, Sharp DJ, Vale RD (2002) Drosophila EB1 is important for proper  
894 assembly, dynamics, and positioning of the mitotic spindle. *J Cell Biol* 158: 873-84
- 895 Roostalu J, Cade NI, Surrey T (2015) Complementary activities of TPX2 and chTOG constitute  
896 an efficient importin-regulated microtubule nucleation module [corrigendum: same issue,  
897 p.1512]. *Nat Cell Biol* 17: 1422-34
- 898 Roostalu J, Thomas C, Cade NI, Kunzelmann S, Taylor IA, Surrey T (2020) The speed of GTP  
899 hydrolysis determines GTP cap size and controls microtubule stability. *eLife* 9
- 900 Sánchez-Soriano N, Gonçalves-Pimentel C, Beaven R, Haessler U, Ofner L, Ballestrem C,  
901 Prokop A (2010) Drosophila growth cones: a genetically tractable platform for the analysis of  
902 axonal growth dynamics. *Dev Neurobiol* 70: 58-71
- 903 Sánchez-Soriano N, Travis M, Dajas-Bailador F, Goncalves-Pimentel C, Whitmarsh AJ, Prokop  
904 A (2009) Mouse ACF7 and Drosophila Short stop modulate filopodia formation and  
905 microtubule organisation during neuronal growth. *J Cell Sci* 122: 2534-42

- 906 Sayas CL, Tortosa E, Bollati F, Ramirez-Rios S, Arnal I, Avila J (2015) Tau regulates the  
907 localization and function of End-binding proteins 1 and 3 in developing neuronal cells. *J*  
908 *Neurochem* 133: 653-67
- 909 Schaedel L, John K, Gaillard J, Nachury MV, Blanchoin L, Theyry M (2015) Microtubules self-  
910 repair in response to mechanical stress. *Nat Mater* 14: 1156-63
- 911 Sive HL, Grainger RM, Harland RM (2010) Microinjection of Xenopus oocytes. *Cold Spring Harb*  
912 *Protoc* 2010: pdb prot5536
- 913 Slater PG, Cammarata GM, Samuelson AG, Magee A, Hu Y, Lowery LA (2019) XMAP215  
914 promotes microtubule-F-actin interactions to regulate growth cone microtubules during axon  
915 guidance. *J Cell Sci*: jcs.224311
- 916 Strumpf D, Volk T (1998) Kakapo, a novel *Drosophila* protein, is essential for the restricted  
917 localization of the neuregulin-like factor, Vein, at the muscle-tendon junctional site. *J Cell Biol*  
918 143: 1259-1270
- 919 Takei Y, Teng J, Harada A, Hirokawa N (2000) Defects in axonal elongation and neuronal  
920 migration in mice with disrupted tau and map1b genes. *J Cell Biol* 150: 989-1000
- 921 Tang Q, Rui M, Bu S, Wang Y, Chew LY, Yu F (2020) A microtubule polymerase is required for  
922 microtubule orientation and dendrite pruning in *Drosophila*. *EMBO J* 39: e103549
- 923 Thawani A, Kadzik RS, Petry S (2018) XMAP215 is a microtubule nucleation factor that  
924 functions synergistically with the  $\gamma$ -tubulin ring complex. *Nature Cell Biology* 20: 575-585
- 925 Tymanskyj SR, Scales TM, Gordon-Weeks PR (2012) MAP1B enhances microtubule assembly  
926 rates and axon extension rates in developing neurons. *Mol Cell Neurosci* 49: 110-19
- 927 van der Vaart B, Franker MA, Kuijpers M, Hua S, Bouchet BP, Jiang K, Grigoriev I, Hoogenraad  
928 CC, Akhmanova A (2012) Microtubule Plus-End Tracking Proteins SLAIN1/2 and ch-TOG  
929 Promote Axonal Development. *J Neurosci* 32: 14722-8
- 930 Vemu A, Szczesna E, Zehr EA, Spector JO, Grigorieff N, Deaconescu AM, Roll-Mecak A (2018)  
931 Severing enzymes amplify microtubule arrays through lattice GTP-tubulin incorporation.  
932 *Science* 361: eaau1504
- 933 Villarroel-Campos D, Gonzalez-Billault C (2014) The MAP1B case: an old MAP that is new  
934 again. *Dev Neurobiol* 74: 953-71
- 935 Voelzmann A, Hahn I, Pearce S, Sánchez-Soriano NP, Prokop A (2016) A conceptual view at  
936 microtubule plus end dynamics in neuronal axons. *Brain Res Bulletin* 126: 226-37
- 937 Voelzmann A, Liew Y-T, Qu Y, Hahn I, Melero C, Sánchez-Soriano N, Prokop A (2017)  
938 *Drosophila* Short stop as a paradigm for the role and regulation of spectraplakins. *Sem Cell*  
939 *Dev Biol* 69: 40-57
- 940 Wieczorek M, Bechstedt S, Chaaban S, Brouhard GJ (2015) Microtubule-associated proteins  
941 control the kinetics of microtubule nucleation. *Nat Cell Biol* 17: 907-16
- 942 Wu X, Kodama A, Fuchs E (2008) ACF7 regulates cytoskeletal-focal adhesion dynamics and  
943 migration and has ATPase activity. *Cell* 135: 137-48
- 944 Yang N, Inaki M, Cliffe A, Rørth P (2012) Microtubules and Lis-1/NudE/dynein regulate invasive  
945 cell-on-cell migration in *Drosophila*. *PLoS One* 7: e40632
- 946 Zanic M, Stear JH, Hyman AA, Howard J (2009) EB1 recognizes the nucleotide state of tubulin  
947 in the microtubule lattice. *PloS one* 4: e7585-e7585
- 948 Zanic M, Widlund PO, Hyman AA, Howard J (2013) Synergy between XMAP215 and EB1  
949 increases microtubule growth rates to physiological levels. *Nat Cell Biol* 15: 688-693

950

951

952

953 **Figures**

954

955 **Fig. 1.** Eb1, Msps and Tau share the same combination of axonal loss-of-function phenotypes  
956 *Drosophila* in primary neurons. **A-H)** Images of representative examples of pre-cultured  
957 embryonic primary neurons either immuno-stained for Eb1 (top) or for tubulin (bottom); neurons  
958 were either wild-type controls (ctrl) or carried the mutant alleles *msps*<sup>1</sup>, *tau*<sup>KO</sup> or *Eb1*<sup>04524</sup> in  
959 homozygosis (from left to right); asterisks indicate cell bodies, black arrow heads the axon tips,  
960 white arrow heads point at areas of MT disorganisation, dashed squares in A-D are shown as  
961 3.5-fold magnified close-ups below each image with black arrows pointing at Eb1 comets; the  
962 axonal outline in D is indicated by a dotted line; scale bar in A represents 15 µm in all images.  
963 **I-N)** Quantification of different parameters (as indicated above each graph) obtained from pre-  
964 cultured embryonic primary neurons with the same genotypes as shown in A-H. Sample  
965 numbers, and P-values obtained with Kruskal-Wallis ANOVA test for the different genotypes  
966 are indicated in each graph. Error bars represent median ± 95% confidence interval (I - M) or  
967 mean ± SEM (N). For raw data see Tab. T1.

968

969 **Fig. 1-S1.** A candidate screen of axonal loss-of-function phenotypes in primary neurons. Graphs  
970 show extended data sets for four of the parameters displayed in Fig. 1 (indicated above each  
971 graph). Data points/bars representing mutant conditions for different genes are consistently  
972 colour-coded in all graphs, and conditions used are indicated below (6HIV, cultured from  
973 embryos for 6hrs; 6dpre, cultured from embryos for 12hrs following 6 day pre-culture; L3,  
974 cultured from late larval CNS for 18hrs). Allele names are given as superscript: no slash  
975 indicates homozygous, a present slash hetero-allelic conditions. Data were normalised to  
976 parallel controls (dashed horizontal line) and are shown as median ± 95% confidence interval  
977 (B,C) or mean ± SEM (A,D); merged sample numbers from at least two experimental repeats  
978 consisting of 3 samples each are shown at the bottom, P-values obtained with Kruskal-Wallis  
979 ANOVA test above data points/bars. For raw data see Tab. T1-S1.

980

981 **Fig. 1-S2.** Correlation of different Eb1 comet properties. **A,B)** Eb1 amount at comets is  
982 calculated as the product of comet length (A) and the fluorescent mean intensity of Eb1 comets  
983 (B), which are both to similar degrees affected by homozygous condition of *msps*<sup>A</sup>, *tau*<sup>KO</sup> and  
984 *Eb1*<sup>04524</sup> in embryo derived neurons cultured for 12hrs following 6 day pre-culture (6dpre) ; data  
985 were normalised to controls (dashed horizontal line) and are shown as median ± 95%  
986 confidence interval; merged sample numbers from at least three experimental repeats are  
987 shown at the bottom, P-values obtained with Kruskal-Wallis ANOVA test above data points. **C)**  
988 Table lists data for Eb1 amounts (fixed neurons; compare Fig.1E-H, L) or for comet  
989 velocity/lifetime (live imaging; compare Fig.1M,N), all obtained from pre-cultured embryonic  
990 primary neurons carrying the same combinations of mutant alleles (indicated on the left; used  
991 alleles: *tub84B*<sup>def</sup>, *msps*<sup>A</sup>, *tau*<sup>KO/Df</sup>, *eb1*<sup>04524</sup>, *sta1*<sup>KO</sup>). **D,E)** Plotting comet velocity or lifetime  
992 against Eb1 amounts from different genetic conditions shows a fairly good correlation (r and p-  
993 value determined via non-parametric Spearman correlation analysis). For raw data see Tab.  
994 T1-S2.

995

996 **Fig. 2.** *Eb1*, *tau* and *msps* interact genetically. **A-B")** Axon length, MT disorganisation and Eb1

997 amount (as indicated on the right), for primary neurons displaying heterozygous (A-A", larval  
998 cultures) and homozygous (B-B', embryonic 6d pre-cultures') mutant conditions, alone or in  
999 combination. Data were normalised to parallel controls (dashed horizontal lines) and are shown  
1000 as median  $\pm$  95% confidence interval (A, A", B, B") or mean  $\pm$  SEM (A', B'); merged sample  
1001 numbers from at least two independent repeats of 3 parallel setups are shown at the bottom, P-  
1002 values obtained with Kruskal-Wallis ANOVA test above data points/bars; used alleles: *msps*<sup>A</sup>,  
1003 *tau*<sup>KO</sup>, *Eb1*<sup>04524</sup>. **C**) Green dots represent data for MT disorganisation (from A', B') plotted against  
1004 Eb1 amounts (from B', B" as well as Fig.1J,L, Fig.1-S1B,D), purple dots show comparable data  
1005 obtained from larval primary neurons (from Fig.A', A', Fig.1-S1B,D), and black dots similar data  
1006 obtained from primary *Xenopus* neurons (Fig.G,H); r and p-value determined via non-parametric  
1007 Spearman correlation analysis; see further detail of these correlations in Fig.2-S2. For raw data  
1008 see Tab. T2.

1009  
1010 **Fig. 2-S1.** Genetic interactions and heterozygous combinations. Graphs show data sets  
1011 extending on data displayed in Fig. 2 for heterozygous mutant conditions. **A**) Eb1 comet  
1012 numbers in fixed primary neurons cultured for 12hrs following 5 day pre-culture. **B**) Comet  
1013 velocity and lifetime obtained from live analyses of primary neurons cultured for 18hrs from late  
1014 larval CNSs. In all graphs, data were normalised to parallel controls (dashed horizontal lines)  
1015 and are shown as median  $\pm$  95% confidence interval (B) or mean  $\pm$  SEM (A); merged sample  
1016 numbers from at least two experimental repeats are shown at the bottom, P-values obtained  
1017 with Kruskal-Wallis ANOVA test above data points/bars; used alleles: *msps*<sup>A</sup>, *tau*<sup>KO</sup>, *Eb1*<sup>04524</sup>.  
1018 For raw data see Tab. T2-S1.

1019  
1020 **Fig. 2-S2.** Increasing Eb1 amounts correlate with decreasing MT disorganisation. The data and  
1021 graph show further details behind the correlations displayed in Fig.2C. **A**) The table shows for  
1022 different allelic combinations and culture conditions (indicated in 2<sup>nd</sup> column; 6HIV, cultured from  
1023 embryos for 6hrs; 6d pre, cultured from embryos for 12hrs following 6 day pre-culture; L3,  
1024 cultured from late larval CNS for 18hrs) the respective Eb1 amounts (3<sup>rd</sup> column) and MT  
1025 disorganisation (4<sup>th</sup> column), as obtained from different sets of experiments throughout this work  
1026 (5<sup>th</sup> column lists the figures from where these data originate); numbers in the 1<sup>st</sup> column  
1027 correspond to numbers of data points in the graph in B. **B**) Correlation plot of the data shown in  
1028 A, with numbers and colours of data points corresponding to the 1<sup>st</sup> column; r and p-value  
1029 determined via non-parametric Spearman correlation analysis. For raw data see Tab. T2-S2.

1030  
1031 **Fig. 3.** Eb1, Msps and Tau functionally interact in the fly brain and in frog primary neurons. **A,B**)  
1032 Medulla region of adult brains at 26-27 days after eclosure, all carrying the *GMR31F10-Gal4*  
1033 driver and *UAS-GFP- $\alpha$ -tubulin84B* (*GMR-tub*) which together stain MTs in a subset of lamina  
1034 neuron axons that terminate in the medulla; the further genetic background is either wild-type  
1035 (A) or triple-heterozygous (*Eb1*<sup>04524/+</sup> *msps*<sup>A/+</sup> *tau*<sup>KO/KO</sup>); white/black arrows indicate axonal  
1036 swellings without/with MT disorganisation; rectangles outlined by red dashed lines are shown  
1037 as 2.5 fold magnified insets where white arrow heads point at disorganised MTs. **C,D**)  
1038 Quantitative analyses of specimens shown in A and B with respect to the number of axonal  
1039 swelling (C) and swellings with MT disorganisation (D); bars show mean  $\pm$  SEM; P values from  
1040 Kruskal-Wallis one-way tests are given above each column, merged sample numbers (i.e.  
1041 individual axon bundles) from at least two experimental repeats at the bottom of each bar. **E-**

1042 **F''''**) Primary *Xenopus* neurons stained either for tubulin (tub; top; white arrows indicating  
1043 unbundled MTs, white arrowheads unbundled areas with MT disorganisation), black arrows  
1044 comets labelled with MACF43::GFP (MACF43; visible as black spots); blacks dashed squares  
1045 in E-E'''' and F-F'''' shown as 2.5 fold magnified close-ups below; ↓ behind gene symbols  
1046 indicates 50% knock-down thus approximating heterozygous conditions. **G,H**) Quantification of  
1047 specimens shown in E-F'''' with respect to MT disorganisation (G) and comet MACF43::GFP  
1048 amount (H); data were normalised to parallel controls (dashed horizontal lines) and are shown  
1049 as mean ± SEM (G) or median ± 95% confidence interval (H); merged sample numbers from at  
1050 least two experimental repeats are shown at the bottom, P-values obtained with Kruskal-Wallis  
1051 ANOVA test above data points/bars. The scale bar in A represents 15 µm in A,B and 20 µm in  
1052 E-F'''' . For raw data see Tab. T3.

1053  
1054 **Fig. 3-S1**. Support data for *Xenopus* experiments. **A-B'**) A RT-PCR DNA gel/Western blot and  
1055 their quantifications showing the degrees of EB3/Tau knock-downs upon application of different  
1056 morpholino concentrations (indicated on top in blots and at the bottom in graphs), using ODC1  
1057 and β-actin as loading controls; data are normalised to no-morpholino controls from two  
1058 experimental repeats (dashed lines). 50% knock-down of XMAP215 was achieved by injecting  
1059 6 ng of the validated XMAP215 MO as described previously (Lowery et al., 2013, Slater et al.,  
1060 2019). **C-G**) Different properties of MACF43::GFP comets (as indicated upon graphs) obtained  
1061 from *Xenopus* primary neurons, either upon 50% (C,D) or 70% (E-G) knock-down of respective  
1062 genes (indicated as 50/70%KD); data were normalised to parallel controls (dashed horizontal  
1063 lines) and are shown as median ± 95% confidence interval; merged sample numbers from at  
1064 least two experimental repeats are shown at the bottom, P-values obtained with Kruskal-Wallis  
1065 ANOVA and Dunn's posthoc test above data points. For raw data see Tab. T3-S1.

1066  
1067 **Fig. 4**. Eb1 and Msps depend on each other for MT plus end localisation. **A-A''**) Primary neurons  
1068 at 6HIV co-expressing Eb1::mCherry (magenta, Eb1) and Msps<sup>FL</sup>::GFP (green, Msps) and  
1069 imaged live; asterisks indicate somata, scale bar represents 10µm, dashed boxes indicate the  
1070 positions of the 3.5-fold magnified close-ups shown at the bottom with arrowheads pointing at  
1071 the position of Msps::GFP accumulation (same in C,C'). **B,B'**) Kymograph of live movies (as in  
1072 A-A'') with the dashed line on the left representing the dashed lines shown in A' and A'' (i.e. the  
1073 length of the axon; proximal at the top) and the x-axis indicating time; arrowheads point at  
1074 trajectories of Msps and Eb1 which are almost identical. **C**) Primary neurons expressing  
1075 Msps::GFP and imaged live, either displaying wild-type background (ctrl) or being homozygous  
1076 mutant for *Eb1*<sup>O4524</sup> (*Eb1*<sup>-/-</sup>); white arrowheads point at Msps::GFP comets which are much  
1077 smaller in the mutant neurons. **D**) Schematic representations of Msps<sup>FL</sup>::GFP and  
1078 Msps<sup>ΔCTD</sup>::GFP. **D',D''**) Graphs displaying axon length and MT disorganisation (as indicated) for  
1079 pre-cultured embryonic primary neurons expressing GFP or Msps::GFP constructs via the *eIav*-  
1080 *Gal4* driver, either in wild-type or *msps*<sup>Δ/1</sup> mutant background; data were normalised to parallel  
1081 controls (dashed horizontal lines) and are shown as median ± 95% confidence interval (D') or  
1082 mean ± SEM (D''); merged sample numbers from at least two experimental repeats are shown  
1083 at the bottom, P-values obtained with Kruskal-Wallis ANOVA test above data points/bars. **E**)  
1084 Model view of the results shown here and in Fig. 1; for explanations see main text and  
1085 Discussion. For raw data see Tab. T4.

1086



1087 **Fig. 4-S1.** Loss of Tacc or Sentin does not cause obvious axonal phenotypes. Axon length (**A**)  
1088 and MT disorganisation (**B**) for primary neurons at 6HIV which were either wild-type (wt) or  
1089 homozygous mutant for *sentin* or *dTACC* (as indicated); data were normalised to parallel  
1090 controls (dashed horizontal lines) and are shown as median  $\pm$  95% confidence interval (A) or  
1091 mean  $\pm$  SEM (B); merged sample numbers from at least two experimental repeats are shown  
1092 at the bottom, P-values obtained with Kruskal-Wallis ANOVA test above data points/bars. For  
1093 raw data see Tab. T4-S1.

1094  
1095 **Fig. 5.** Tau promotes Eb1 pools at MT plus ends by outcompeting its association with the MT  
1096 lattice. **A-A''**) Example of neuron imaged live with disorganised MTs to illustrate Tau binding  
1097 (green) along the MT lattice, separated from Eb1 comets (magenta); asterisks indicate somata,  
1098 the scale bar represents 10 $\mu$ m, dashed boxes indicate the positions of the 4fold magnified  
1099 close-ups shown at the bottom, white arrowheads point at Eb1 comets (same in B-D). **B-D**)  
1100 Primary neurons at 6HIV stained for Eb1 which are either wild-type (B), *tau*<sup>KO/Df</sup> mutant (C) or  
1101 *tau*<sup>KO/Df</sup> mutant plus expressing Eb1::GFP driven by *elav-Gal4* (D); white/red arrowheads  
1102 indicate Eb1 comets/lattice localisation. **E-I**) Different parameters (as indicated) of control (ctrl)  
1103 or *tau*<sup>KO/Df</sup> (*tau*<sup>-/-</sup>) mutant neurons without/with *elav-Gal4*-driven expression of Eb1::GFP or Shot-  
1104 Ctail::GFP (as indicated); data were normalised to parallel controls (dashed horizontal lines)  
1105 and are shown as mean  $\pm$  SEM (I) or median  $\pm$  95% confidence interval (E-H); merged sample  
1106 numbers from at least two independent repeats with 3 experimental setups each are shown at  
1107 the bottom, P-values obtained with Kruskal-Wallis ANOVA and Dunn's posthoc test above data  
1108 points/bars. **J**) Model view of the results shown here; for explanations see main text and  
1109 Discussion. For raw data see Tab. T5.

1110  
1111 **Fig. 5-S1** Upon tau deficiency, GTP-tubulin is reduced at MT plus ends but unchanged at  
1112 lattices. **A-B''**) Fixed primary neurons stained for Eb1 (magenta) and GTP-tubulin (green);  
1113 asterisks indicate somata, scale bar represents 10 $\mu$ m, dashed boxes indicate the positions of  
1114 the 4fold magnified close-ups shown at the bottom, arrowheads point at Eb1::GFP comets and  
1115 GTP caps. **C,D**) Graphs showing staining intensity of GTP-tubulin at MT plus ends (C) and  
1116 along the MT lattice (D), and that *msps*<sup>A/146</sup> mutant phenotypes were not rescued by Eb1::GFP  
1117 expression (C,D). **E**) Graphs showing staining intensity of Eb1 along the MT lattice of neurons  
1118 without/with *elav-Gal4*-driven expression of *dtau*. Overexpression of *dtau* leads to a reduction  
1119 of Eb1 at the MT shaft; data were normalised to parallel controls (dashed horizontal lines) and  
1120 are shown as median  $\pm$  95% confidence interval; merged sample numbers from at least two  
1121 independent repeats with 3 experimental setups each are shown at the bottom, P-values  
1122 obtained with Kruskal-Wallis ANOVA test above data points/bars. For raw data see Tab. T5-  
1123 S1.

1124  
1125 **Fig. 5-S2** Eb1 overexpression does not rescue *msps* mutant phenotypes. Graphs show that  
1126 Eb1 lattice localisation is unaffected by loss of Msps in primary neurons at 6HIV (A) or at ~12HIV  
1127 following 6 day preculture (B). Staining intensity of GTP-tubulin at MT plus ends is reduced in  
1128 *msps*<sup>A/A</sup> and *Eb1*<sup>04524/04524</sup> mutant at 6dpre (C). Expressing Eb1::GFP via *elav-Gal4* does not  
1129 rescue comet velocities (D), comet lifetime  $\epsilon$  and MT disorganisation (F) in primary neurons of  
1130 *msps*<sup>A/146</sup> mutants (cultured 12HIV following 6 day preculture); data were normalised to parallel  
1131 controls (dashed horizontal lines) and are shown as mean  $\pm$  SEM (F) or median  $\pm$  95%  
1132 confidence interval (A-E); merged sample numbers from at least two experimental repeats are  
1133 shown at the bottom, P-values obtained with Kruskal-Wallis ANOVA test with Dunn's posthoc  
1134 analysis above data points/bars. For raw data see Tab. T5-S2

1135

1136 **Fig. 6.** Shot-mediated guidance as a mechanism linking Eb1 at MT plus ends to bundle  
1137 organisation. **A)** Schematic representation of Shot constructs (CH, actin-binding calponin-  
1138 homology domains; EF, EF-hand motifs; GRD, MT-binding Gas2-related domain; Ctail,  
1139 unstructured MT-binding domain containing Eb1-binding SxIP motifs in blue); in Shot-  
1140 3MTLS<sup>\*</sup>::GFP the SxIP motifs are mutated. **B)** Fixed primary larval neurons at 18HIV obtained  
1141 from late larval CNS stained for GFP (green) and tubulin (magenta), which are either wild-type  
1142 (top) or *Eb1*<sup>04524/+</sup> *mmps*<sup>A/+</sup> *tau*<sup>KO/+</sup> triple-heterozygous (indicated on right) expressing GFP or  
1143 either of the constructs shown in D; scale bar 10µm. **C)** Quantification of MT disorganisation of  
1144 neurons as shown in B. **D,E)** MT disorganisation in *shot*<sup>3/3</sup> *Eb1*<sup>04524/04524</sup> double-mutant neurons  
1145 is not enhanced over single mutant conditions assessed in fixed primary neurons at 6HIV (D)  
1146 or 12HIV following 6 day pre-culture (E). In all graphs data were normalised to parallel controls  
1147 (dashed horizontal lines) and are shown as mean ± SEM; merged sample numbers from at least  
1148 two independent repeats with 3 experimental setups each are shown at the bottom, P-values  
1149 obtained with Kruskal-Wallis ANOVA test above bars. **F,F')** Model derived from previous work  
1150 (Alves-Silva et al., 2012), proposing that the spectraplakine Shot cross-links Eb1 at MT plus ends  
1151 with cortical F-actin, thus guiding MT extension in parallel to the axonal surface.

1152  
1153 **Fig. 7.** Model summarising the common functional pathway of Eb1, Msps and Tau. Images on  
1154 the left show functional diagrams and on the right cartoon models for wild-type and four mutant  
1155 conditions as indicated. **A,A')** In wild-type (WT) neurons, the three factors bind independently  
1156 to MTs: Msps to the very tip of plus ends, Eb1 to the GTP-cap (GTP-tubulin shown with yellow  
1157 dots) but lagging behind the front, and Tau along the lattice. Tau promotes Eb1 pools at MT  
1158 plus ends (green arrow in A) by outcompeting its binding along the lattice (green T-bar in A').  
1159 Eb1 and Msps mutually promote each other's localisation (stippled black and red arrows in A,  
1160 A'): Msps is the main promoter of polymerisation (brown arrow), thus sustaining a prominent  
1161 GTP-tubulin cap (pale yellow box in A) for Eb1; Eb1 potentially promotes sheet formation of  
1162 protofilaments at the plus tip (red arrow), thus helping Msps to bind; Eb1 links to Shot (orange  
1163 double-arrow) which provides MT plus end guidance (blue dashed arrow). **B,B')** Upon loss of  
1164 Eb1, the plus end sheet structure is weakened, thus weakening Msps binding and, in turn,  
1165 reducing polymerisation (thinner/shorter arrows, smaller font); Shot detaches, thus abolishing  
1166 guidance (curved off-track extension arrow). **C,C')** Upon loss of Msps, its catalysis of  
1167 polymerisation is abolished, the GTP-tubulin cap shrinks, less Eb1 binds, thus strongly  
1168 weakening Shot binding and guidance. **D,D')** Upon loss of Tau, Eb1 is recruited to the MT lattice,  
1169 thus reducing its plus end amounts; reduced Eb1 negatively impacts on Shot and Msps causing  
1170 the milder guidance and polymerisation effects we observed. **E,E')** Upon loss of Shot, the  
1171 localisation of the other three proteins is unaffected, but guidance is abolished.

1172  
1173 **Movie M1.** Msps::GFP and Eb1::RFP jointly track MT plus ends. Live movie of a wild-type  
1174 neuron co-expressing Msps::GFP and Eb1::RFP; for stills see Fig.4A-B'. As indicated, single  
1175 channels are shown on the left and middle, and the combined movie on the right. The movie  
1176 was acquired at 0.5 frames per second, and play at 0.5 s per frame. The scale bar indicates 10  
1177 µm.

1178  
1179 **Movie M2.** Msps plus end localisation in wild-type neurons. Live movie of a wild-type neuron  
1180 expressing Msps::GFP; for stills see Fig.4C. The movie was acquired at 1 frame per second,  
1181 and plays at 0.2 s per frame. The scale bar indicates 10 µm.

1182

1183 **Movie M3.** Msps plus end localisation is impaired in the absence of Eb1. Live movie of an  
1184 *Eb1*<sup>04524/04524</sup> mutant neuron expressing Msps::GFP; for stills see Fig.4C'. The movie was  
1185 acquired at 1 frames per second, and plays at 0.2 s per frame. The scale bar indicates 10  $\mu$ m.

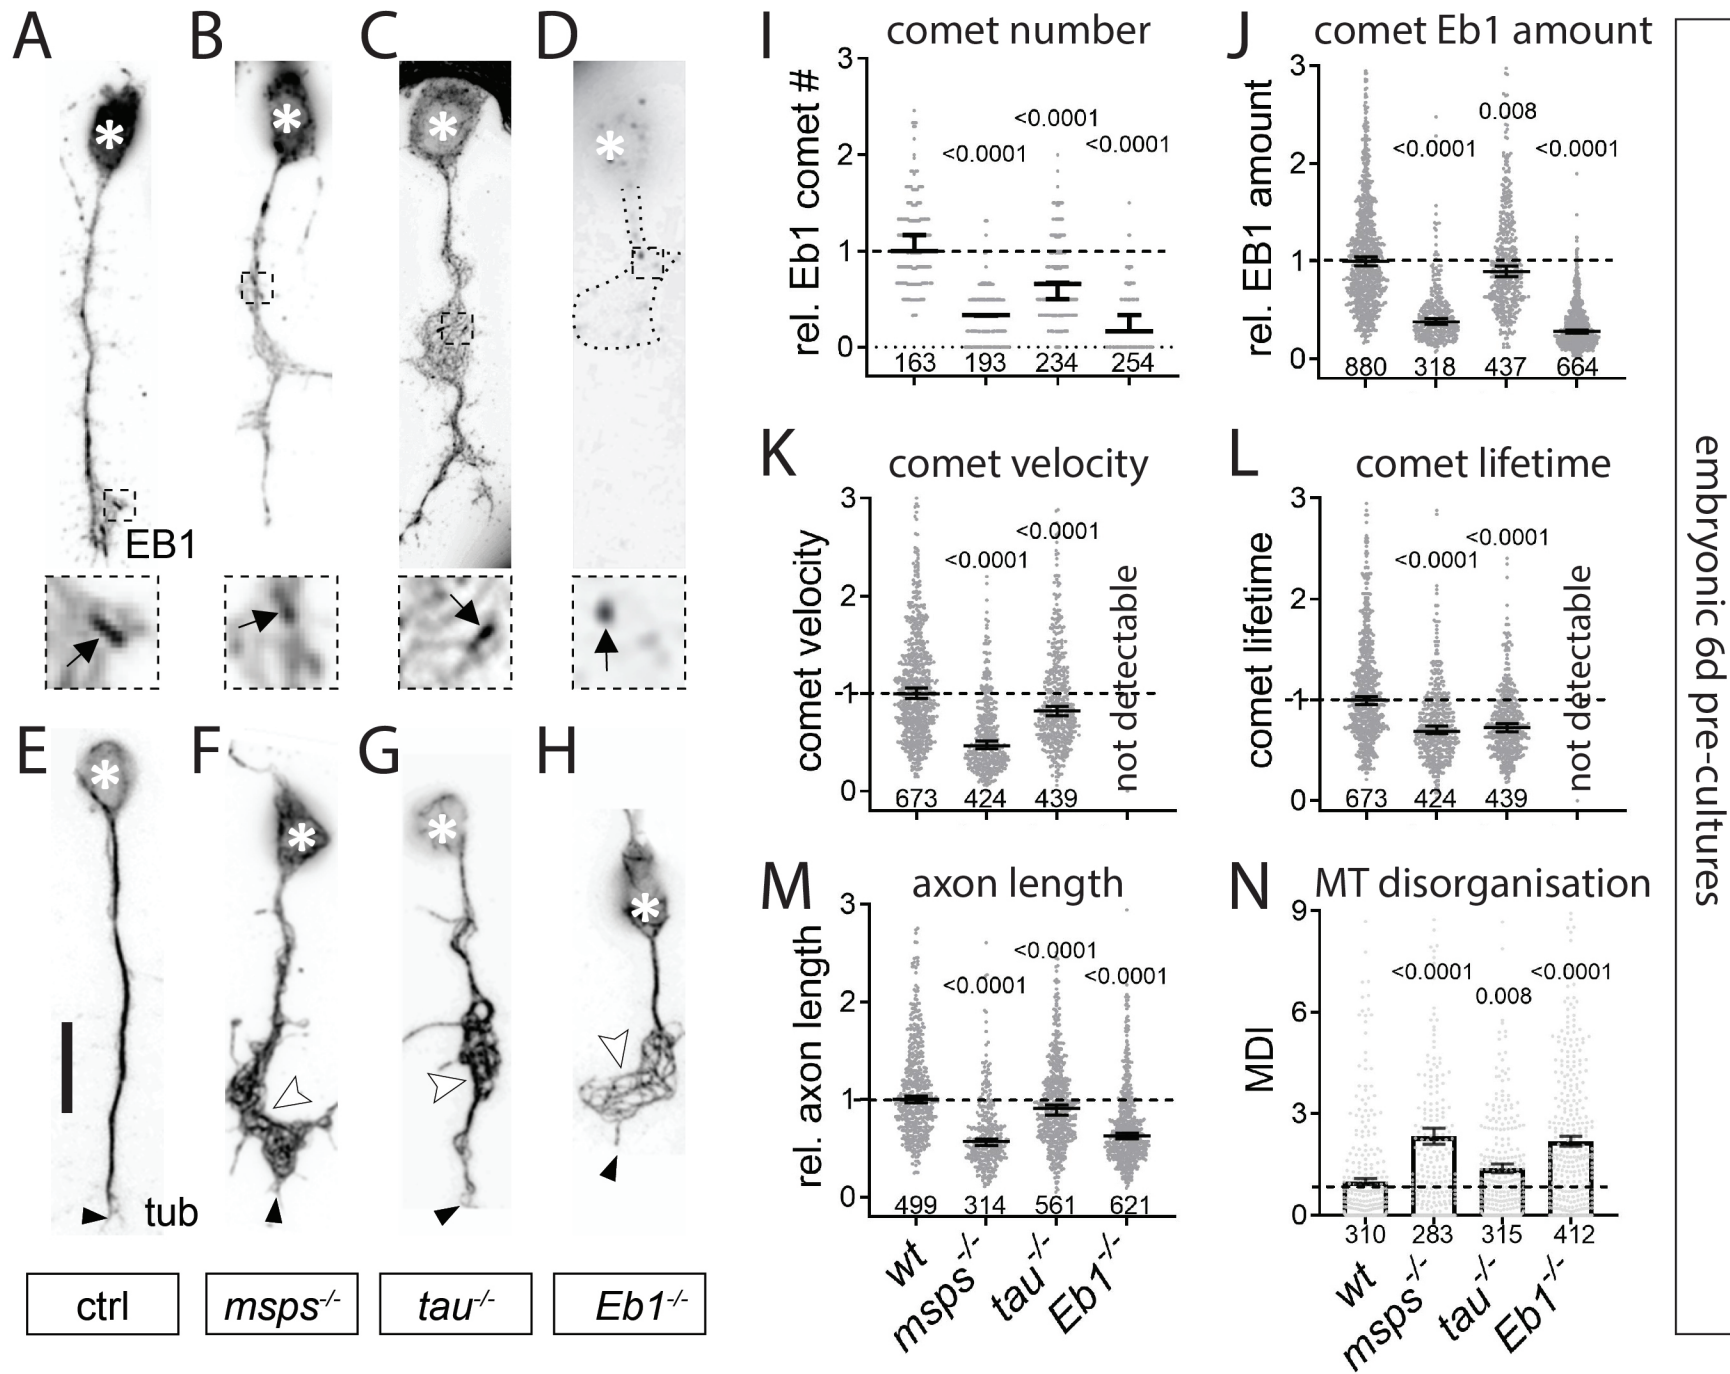

Hahn et al. Fig. 1

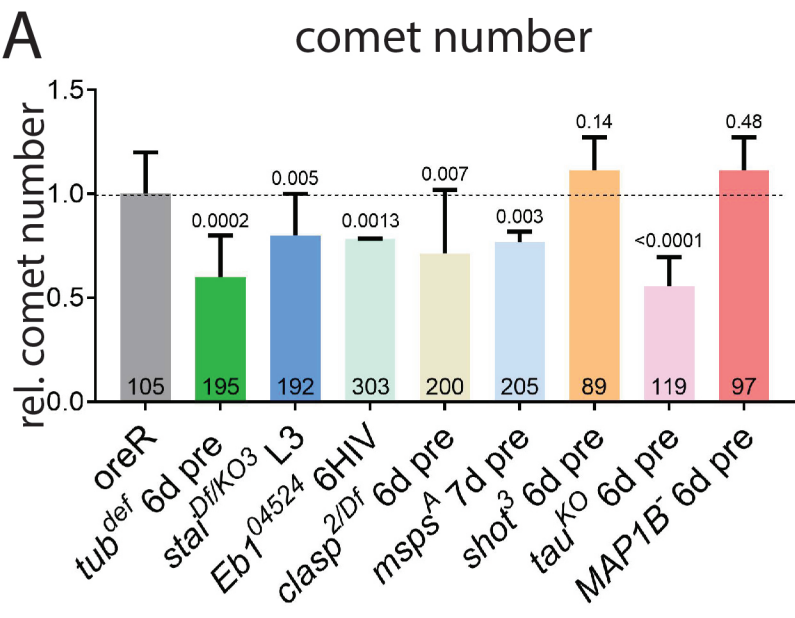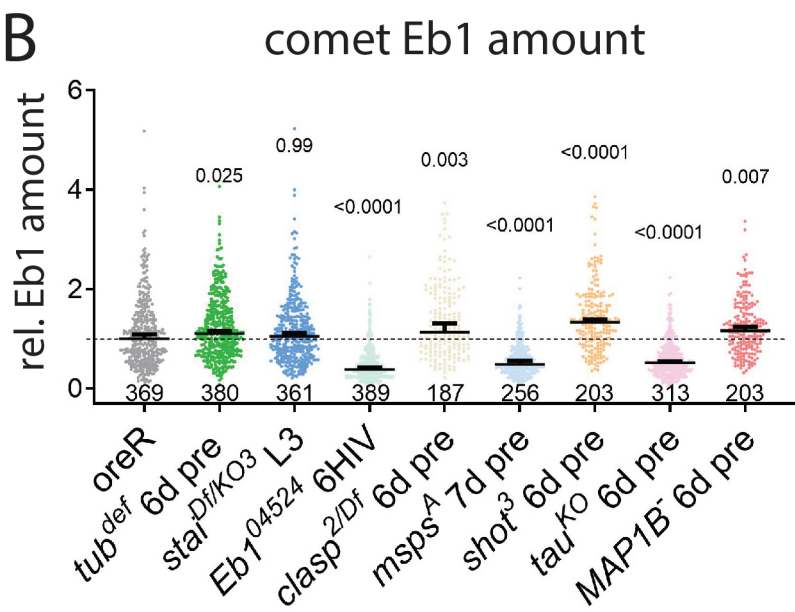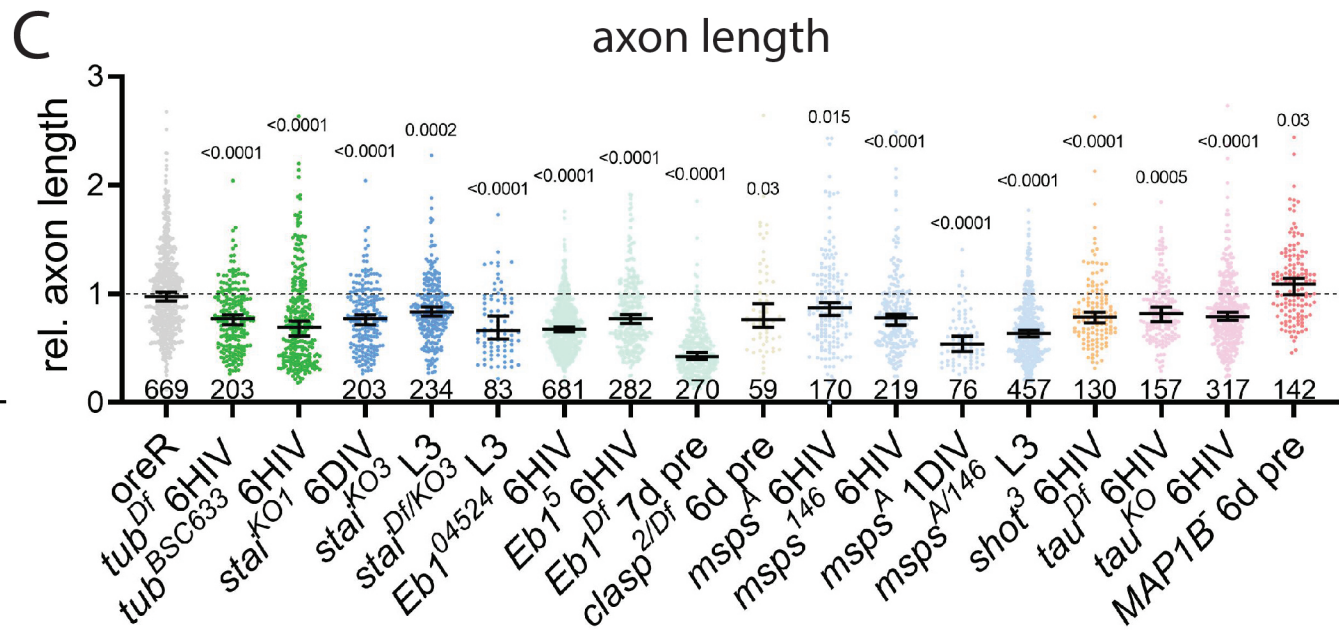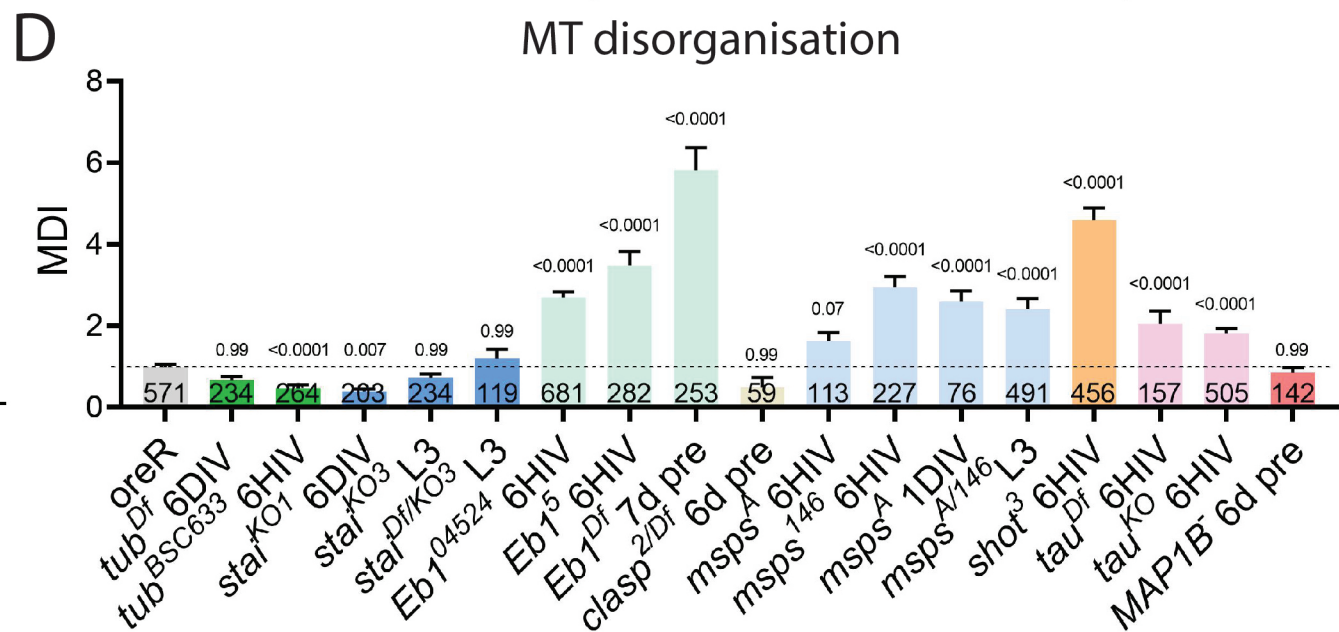

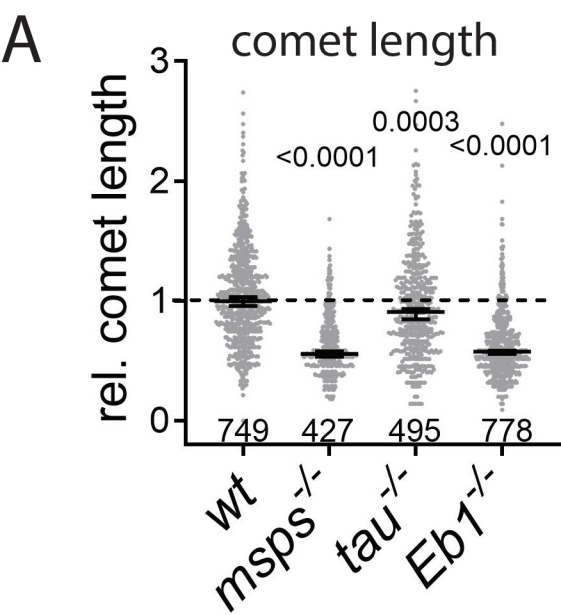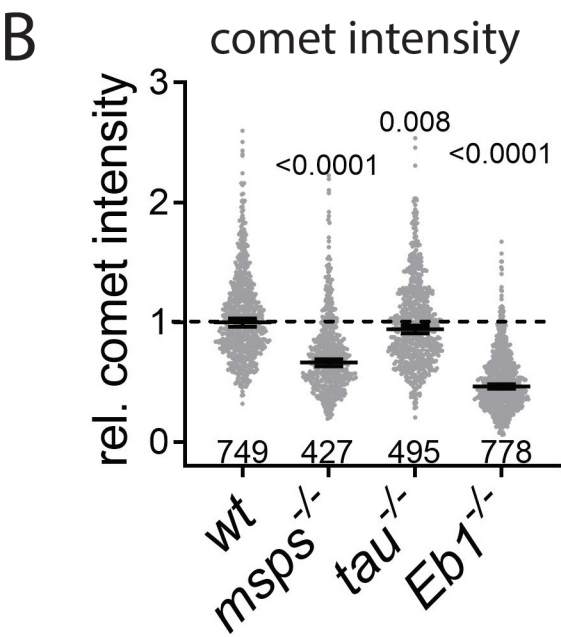

**C**

|                       | Eb1 amount | comet velocity | comet lifetime |
|-----------------------|------------|----------------|----------------|
| ctrl                  | 1.0000     | 1.0000         | 1.0000         |
| tau+/-                | 1.1130     | 1.1010         | 1.0360         |
| msps+/-               | 1.0430     | 0.9792         | 0.9411         |
| eb1+/-                | 0.9028     | 1.1430         | 1.0360         |
| eb1+/- msps+/-        | 0.7093     | 0.8496         | 0.9097         |
| eb1+/- msps+/- tau+/- | 0.3989     | 0.7602         | 0.7879         |
| msps-/-               | 0.3796     | 0.4676         | 0.6905         |
| tau-/-                | 0.8918     | 0.8234         | 0.7246         |
| tubdef/def            | 1.1020     | 1.0720         | 1.0160         |
| stai-/-               | 1.0450     | 0.9107         | 1.0490         |

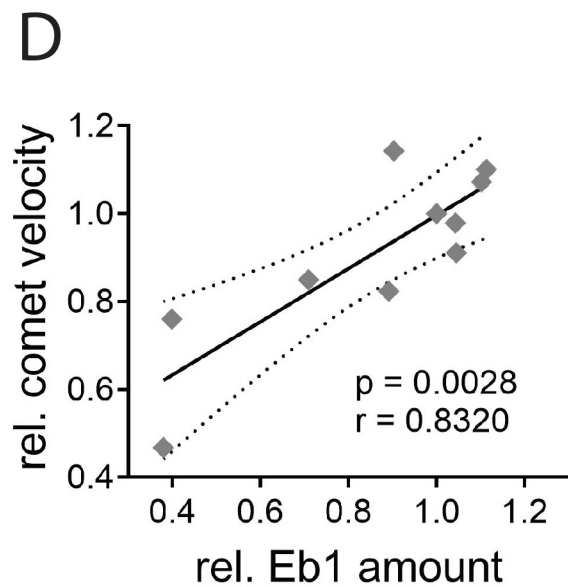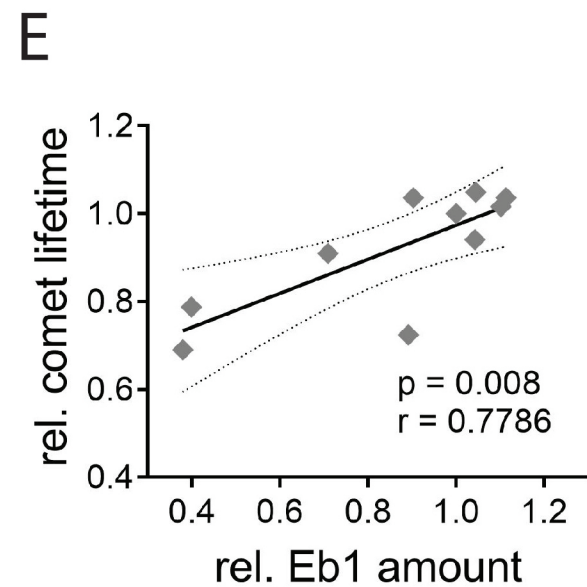

genetic interactions  
(larval cultures)

homozygous mut. combinations  
(embryonic pre-cultures)

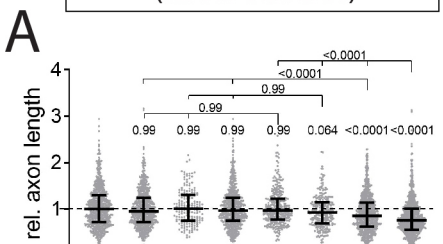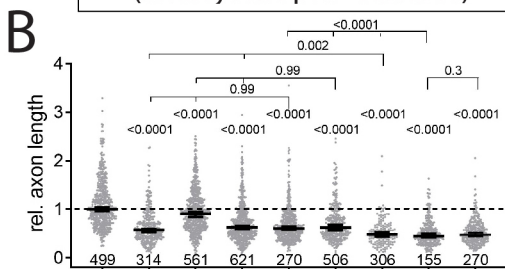

axon length

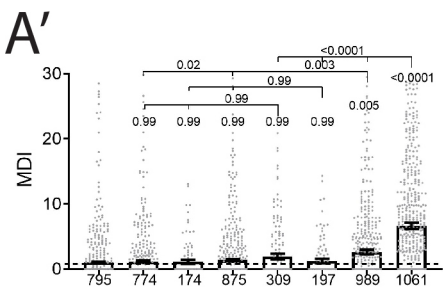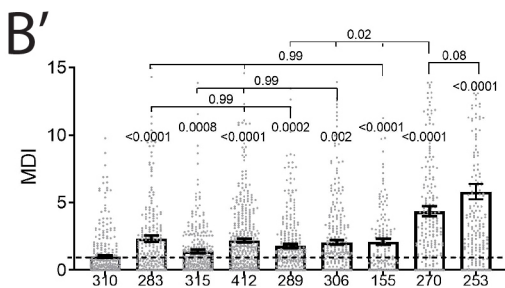

MT  
disorganisation

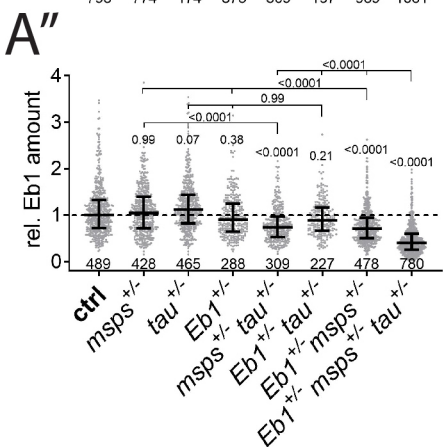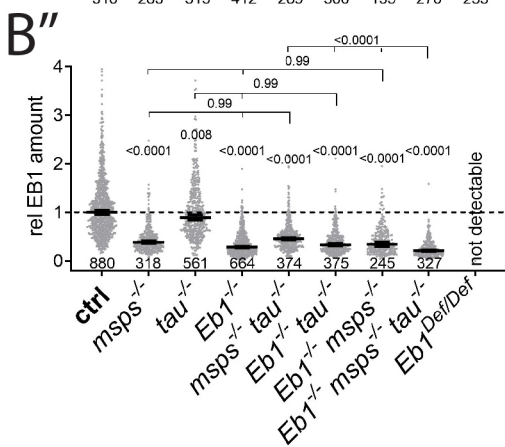

comet  
Eb1 amount

**C**

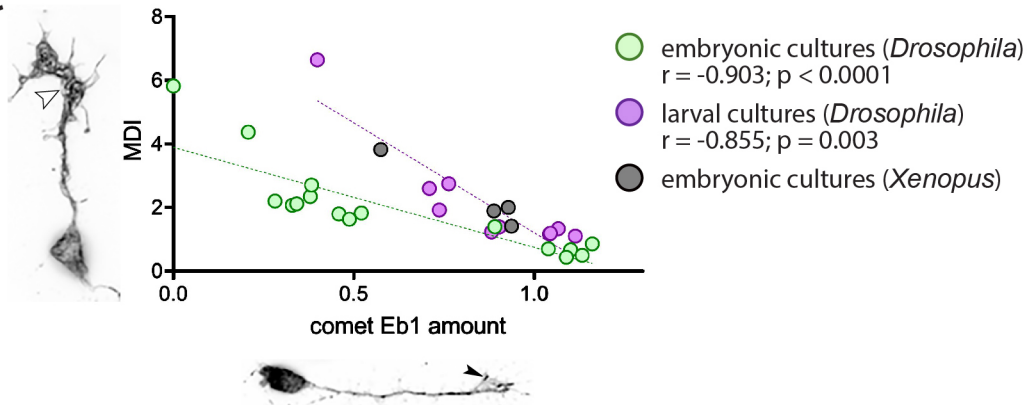

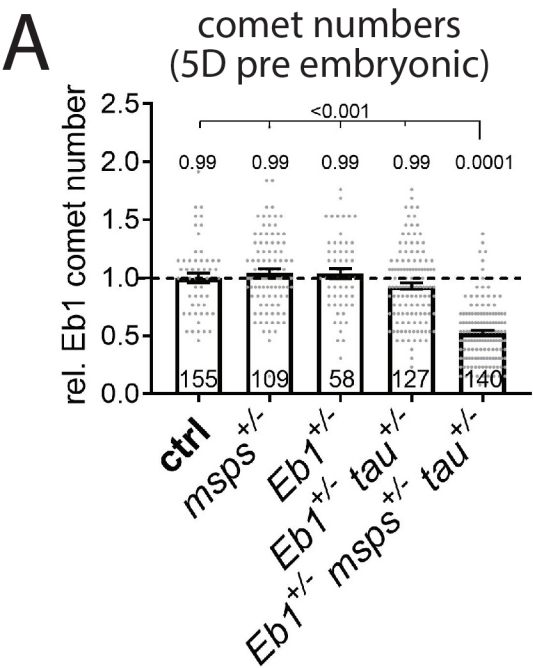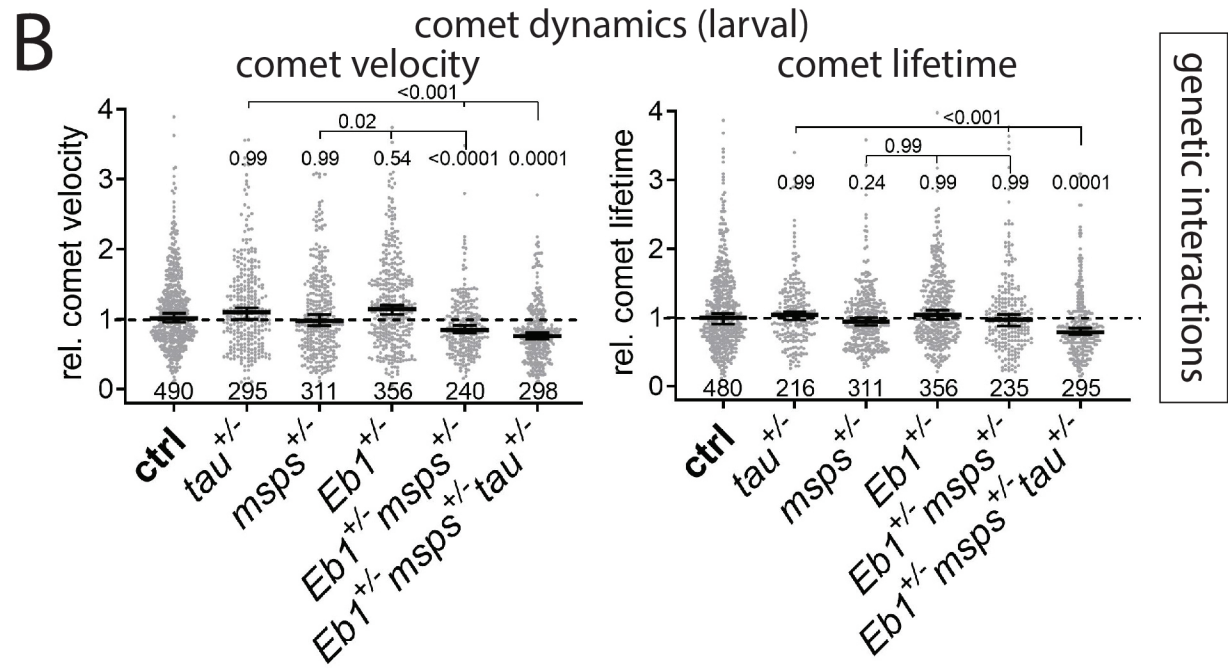



A

|    |                                                                                                 | comet Eb1 amount | MDI    | Figure       |
|----|-------------------------------------------------------------------------------------------------|------------------|--------|--------------|
| 1  | 6d pre <i>mmps</i> <sup>1/1</sup>                                                               | 0.3796           | 2.338  | Fig. XXX1    |
| 2  | 6d pre <i>tau</i> <sup>KO/KO</sup>                                                              | 0.8918           | 1.388  | Fig. XXX1    |
| 3  | 6d pre <i>Eb1</i> <sup>04524/04524</sup>                                                        | 0.282            | 2.191  | Fig. XXX1    |
| 4  | 6d pre <i>mmps</i> <sup>1/1</sup> <i>tau</i> <sup>KO/KO</sup>                                   | 0.4592           | 1.786  | Fig. XXX2    |
| 5  | 6d pre <i>Eb1</i> <sup>04524/04524</sup> <i>tau</i> <sup>KO/KO</sup>                            | 0.3298           | 2.063  | Fig. XXX2    |
| 6  | 6d pre <i>Eb1</i> <sup>04524/04524</sup> <i>mmps</i> <sup>1/1</sup>                             | 0.3421           | 2.109  | Fig. XXX2    |
| 7  | 6d pre <i>Eb1</i> <sup>04524/04524</sup> <i>mmps</i> <sup>1/1</sup> <i>tau</i> <sup>KO/KO</sup> | 0.2077           | 4.363  | Fig. XXX2    |
| 8  | 7d pre <i>Eb1</i> <sup>Def</sup>                                                                | 0                | 5.814  | Fig. XXX2    |
| 9  | 6d pre <i>tub</i> <sup>def</sup>                                                                | 1.102            | 0.6603 | Fig. XXX1-S1 |
| 10 | 6d pre <i>clasp</i> <sup>2/Df</sup>                                                             | 1.134            | 0.4888 | Fig. XXX1-S1 |
| 11 | 6d pre <i>MAP1B</i> <sup>-</sup>                                                                | 1.162            | 0.8491 | Fig. XXX1-S1 |
| 12 | 6HIV <i>Eb1</i> <sup>04524</sup>                                                                | 0.3832           | 2.697  | Fig. XXX1-S1 |
| 13 | 6HIV <i>mmps</i> <sup>A</sup>                                                                   | 0.4884           | 1.622  | Fig. XXX1-S1 |
| 14 | 6HIV <i>tau</i> <sup>KO</sup>                                                                   | 0.5217           | 1.815  | Fig. XXX1-S1 |
| 15 | 6HIV <i>tub</i> <sup>Df</sup>                                                                   | 1.09             | 0.43   | Fig. XXX1-S1 |
| 16 | 6HIV <i>stai</i> <sup>KO1</sup>                                                                 | 1.04             | 0.69   | Fig. XXX1-S1 |
| 17 | L3 <i>mmps</i> <sup>1/+</sup>                                                                   | 1.043            | 1.176  | Fig. XXX2    |
| 18 | L3 <i>tau</i> <sup>KO/+</sup>                                                                   | 1.114            | 1.11   | Fig. XXX2    |
| 19 | L3 <i>Eb1</i> <sup>04524/+</sup>                                                                | 0.9031           | 1.397  | Fig. XXX2    |
| 20 | L3 <i>mmps</i> <sup>1/+</sup> <i>tau</i> <sup>KO/+</sup>                                        | 0.7372           | 1.932  | Fig. XXX2    |
| 21 | L3 <i>tau</i> <sup>KO/+</sup> <i>Eb1</i> <sup>04524/+</sup>                                     | 0.8818           | 1.243  | Fig. XXX2    |
| 22 | L3 <i>mmps</i> <sup>1/+</sup> <i>Eb1</i> <sup>04524/+</sup>                                     | 0.7095           | 2.609  | Fig. XXX2    |
| 23 | L3 <i>mmps</i> <sup>1/+</sup> <i>tau</i> <sup>KO/+</sup> <i>Eb1</i> <sup>04524/+</sup>          | 0.399            | 6.655  | Fig. XXX2    |
| 24 | L3 <i>elavG4</i> ; <i>tau</i> <sup>KO/def</sup>                                                 | 0.7631           | 2.758  | Fig. XXX5    |
| 25 | L3 <i>elav</i> >EB1-GFP, <i>tau</i> KO/def                                                      | 1.067            | 1.34   | Fig. XXX5    |
| 26 | L3 <i>stai</i> <sup>Df/KO3</sup>                                                                | 1.045            | 1.197  | Fig. XXX1-S1 |
| 27 | Xen 50% Tau KD                                                                                  | 0.9358           | 1.411  | Fig. XXX3    |
| 28 | Xen 50% XMAP215 KD                                                                              | 0.8873           | 1.892  | Fig. XXX3    |
| 29 | Xen 50% EB3 KD                                                                                  | 0.9271           | 2.002  | Fig. XXX3    |
| 30 | Xen 50% XMAP215/Tau/EB3 KD                                                                      | 0.5739           | 3.822  | Fig. XXX3    |

B

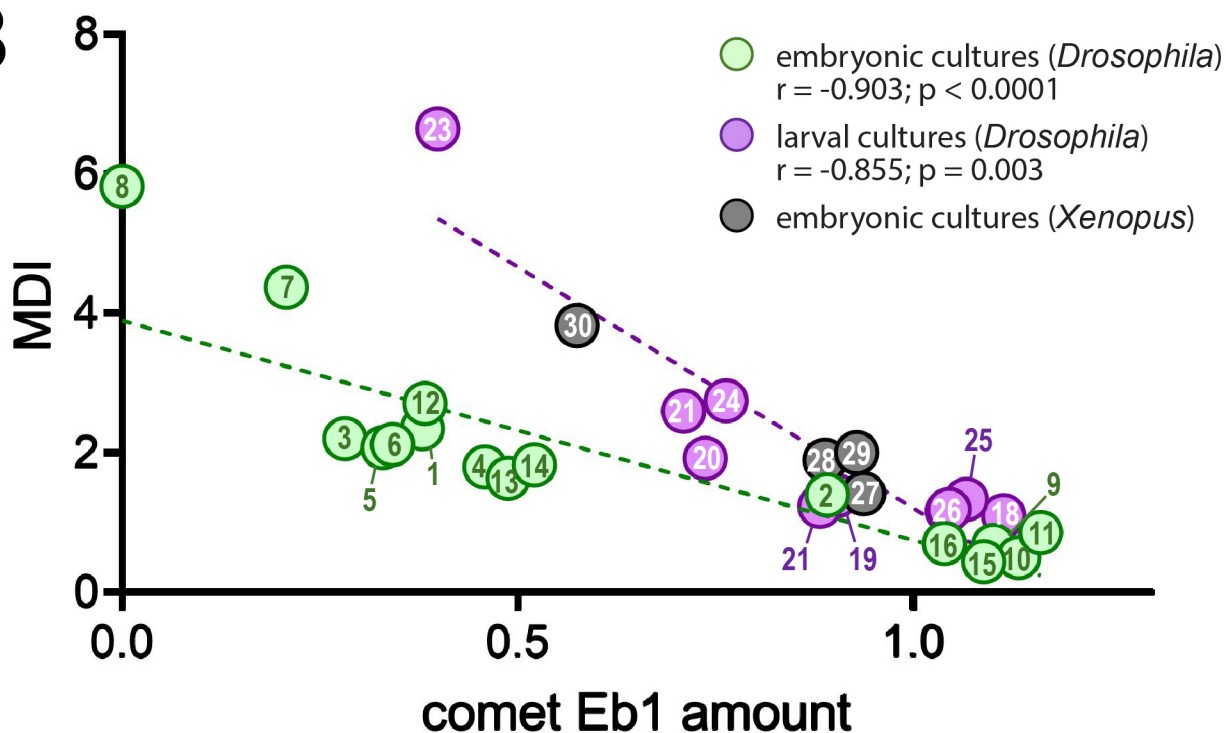

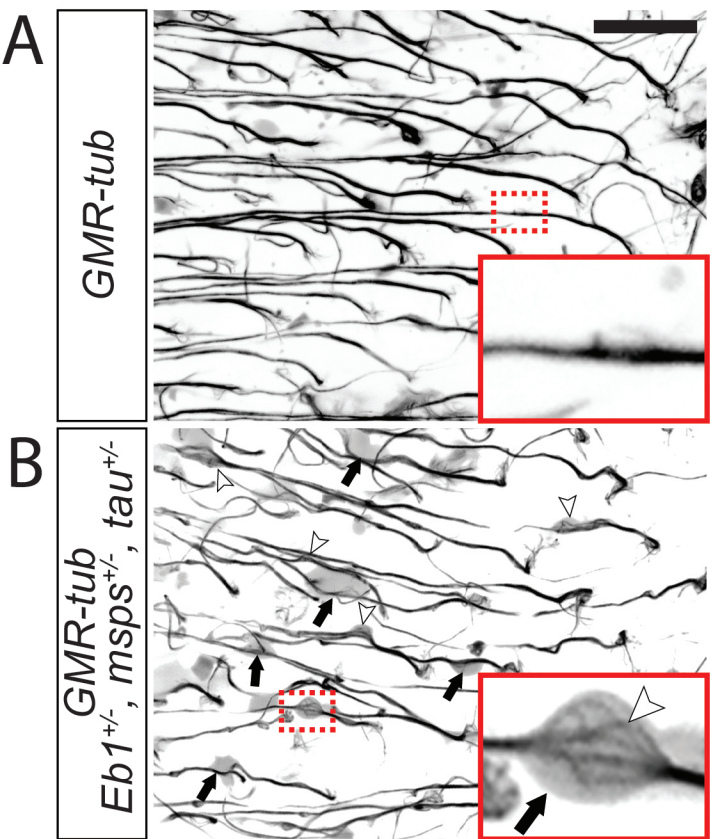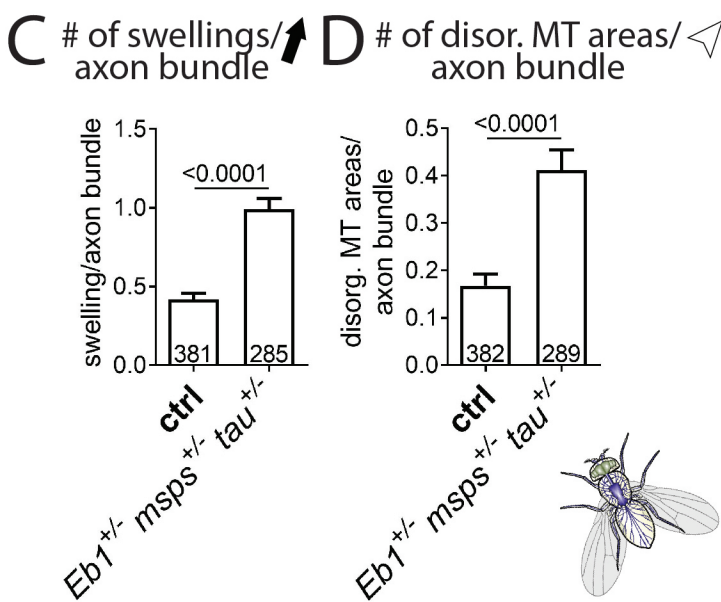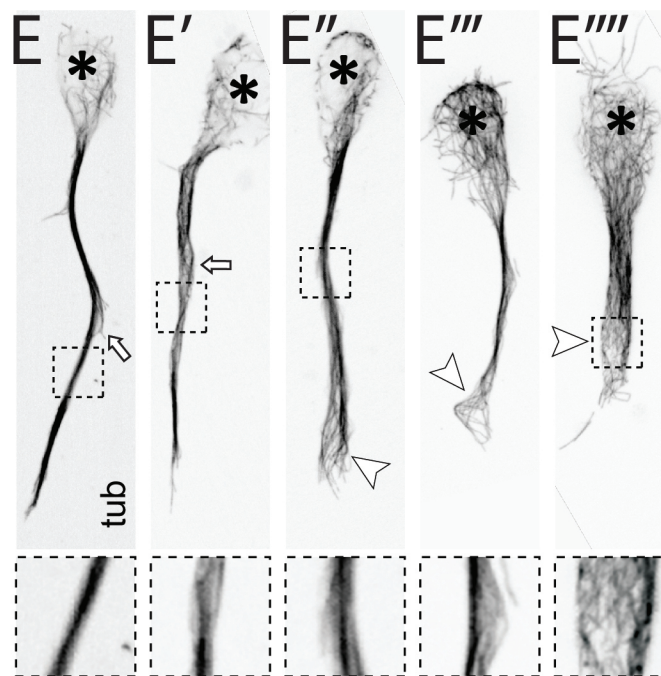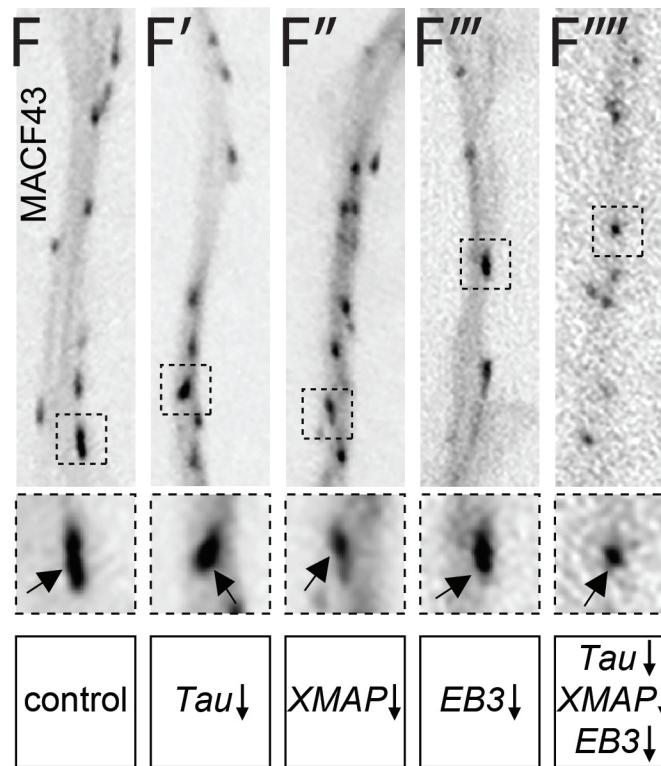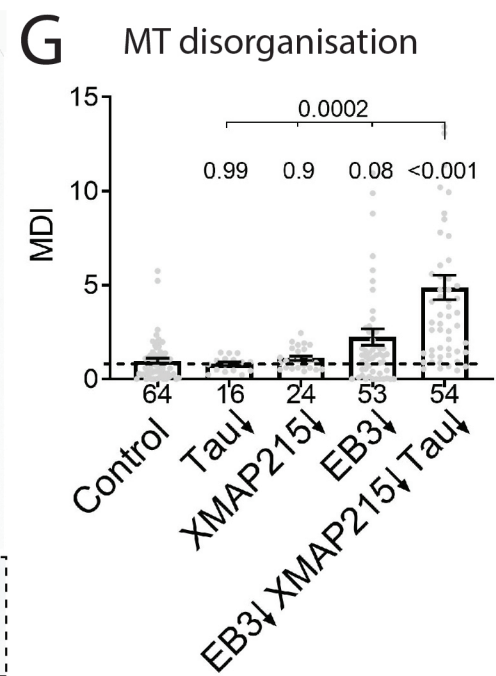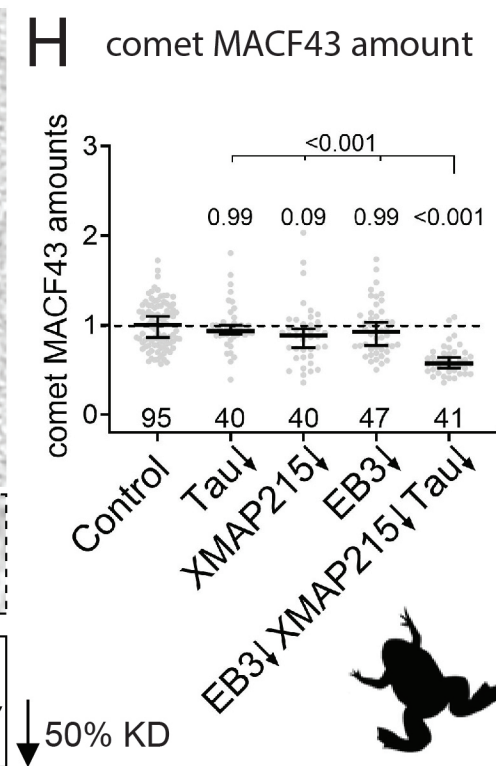

**A**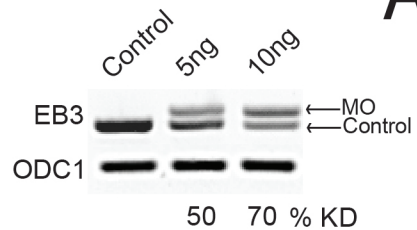**A'**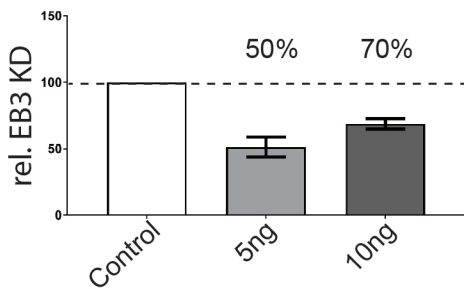**B**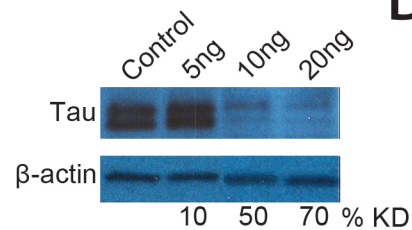**B'**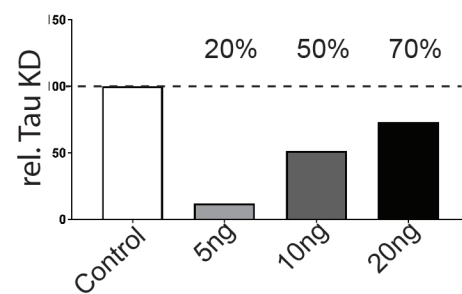**C**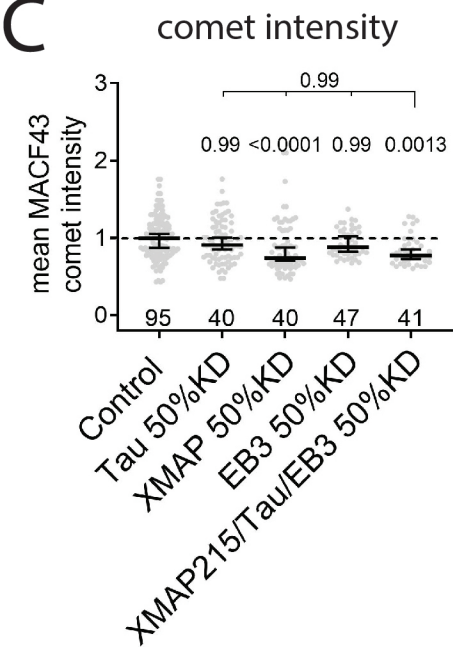**D**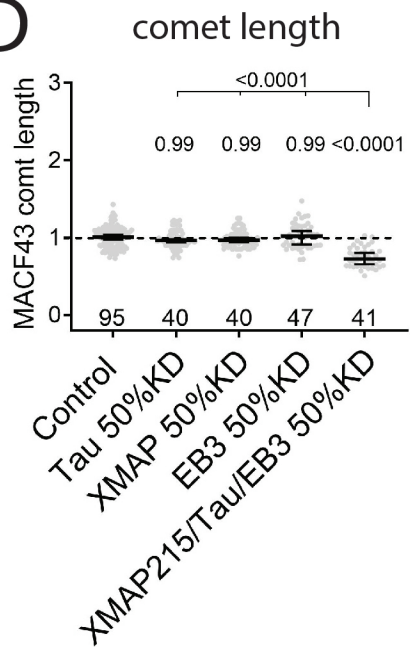

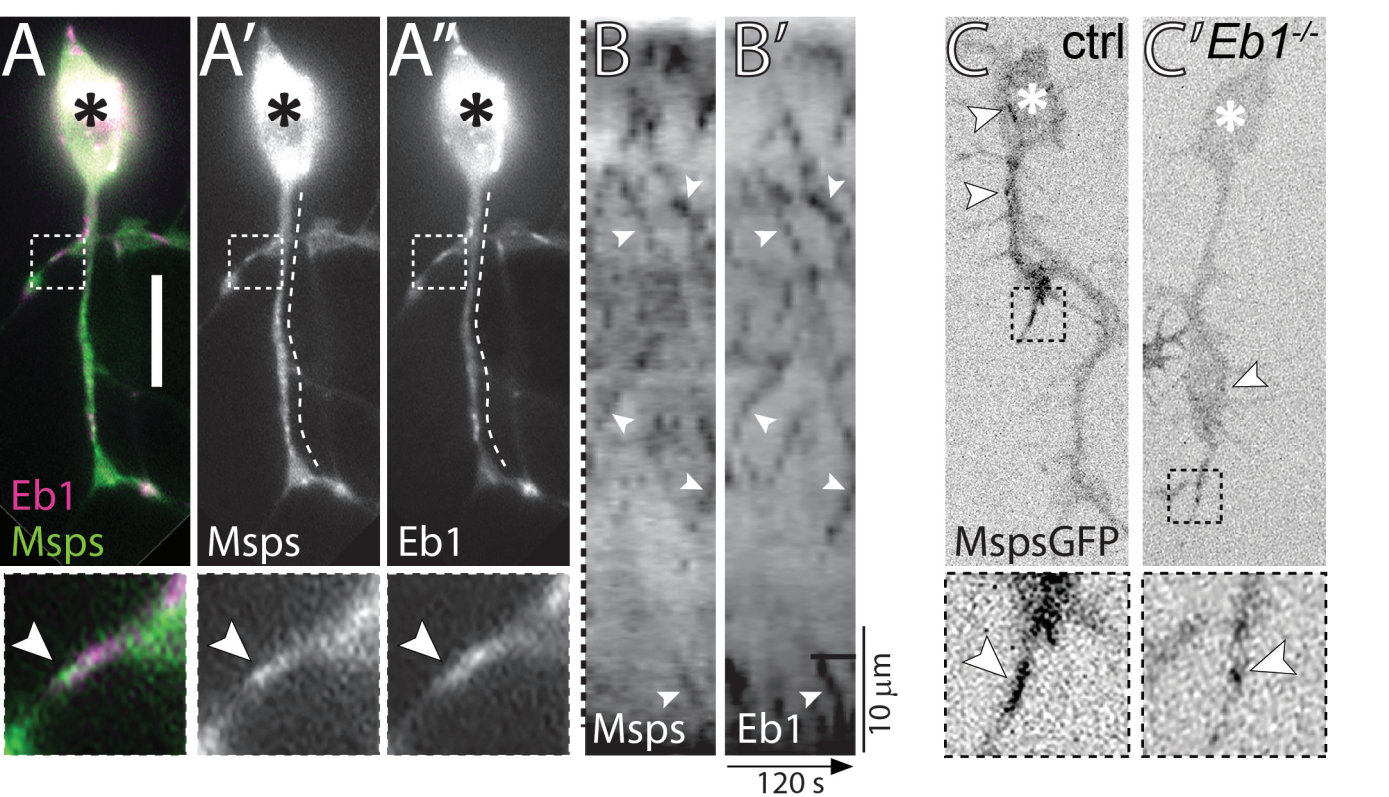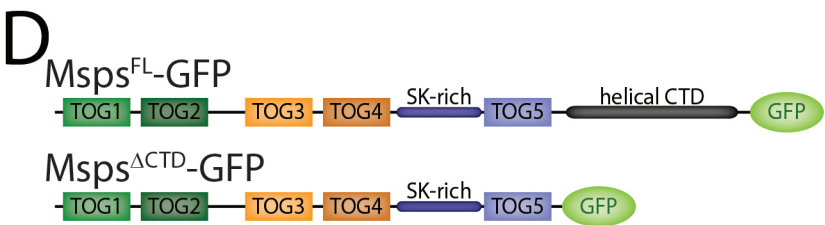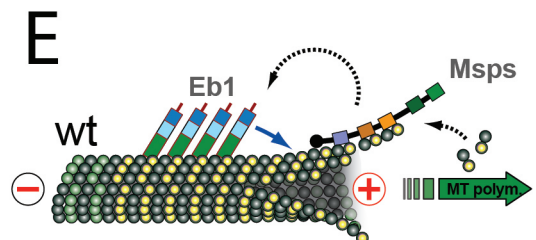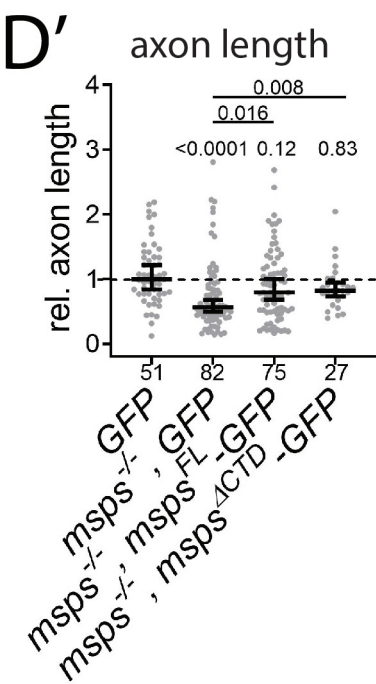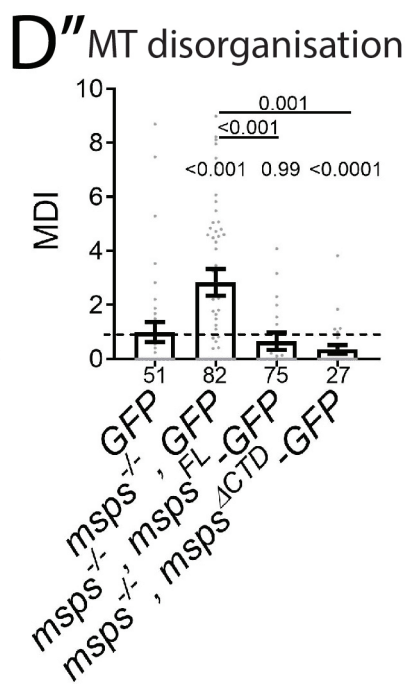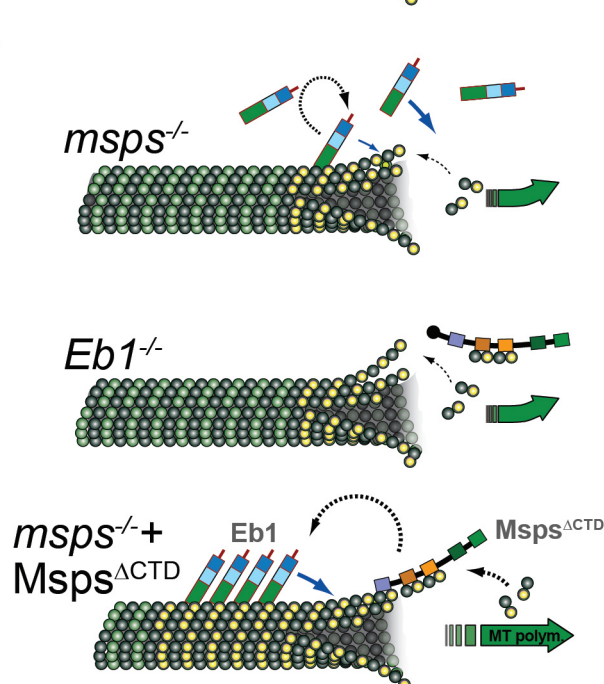

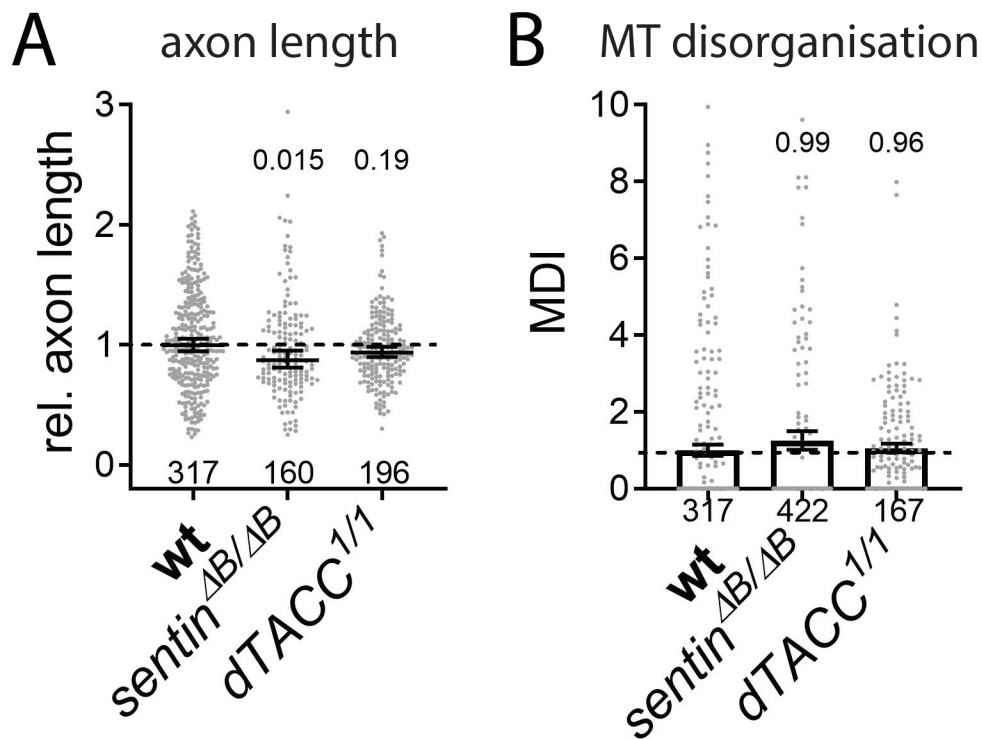

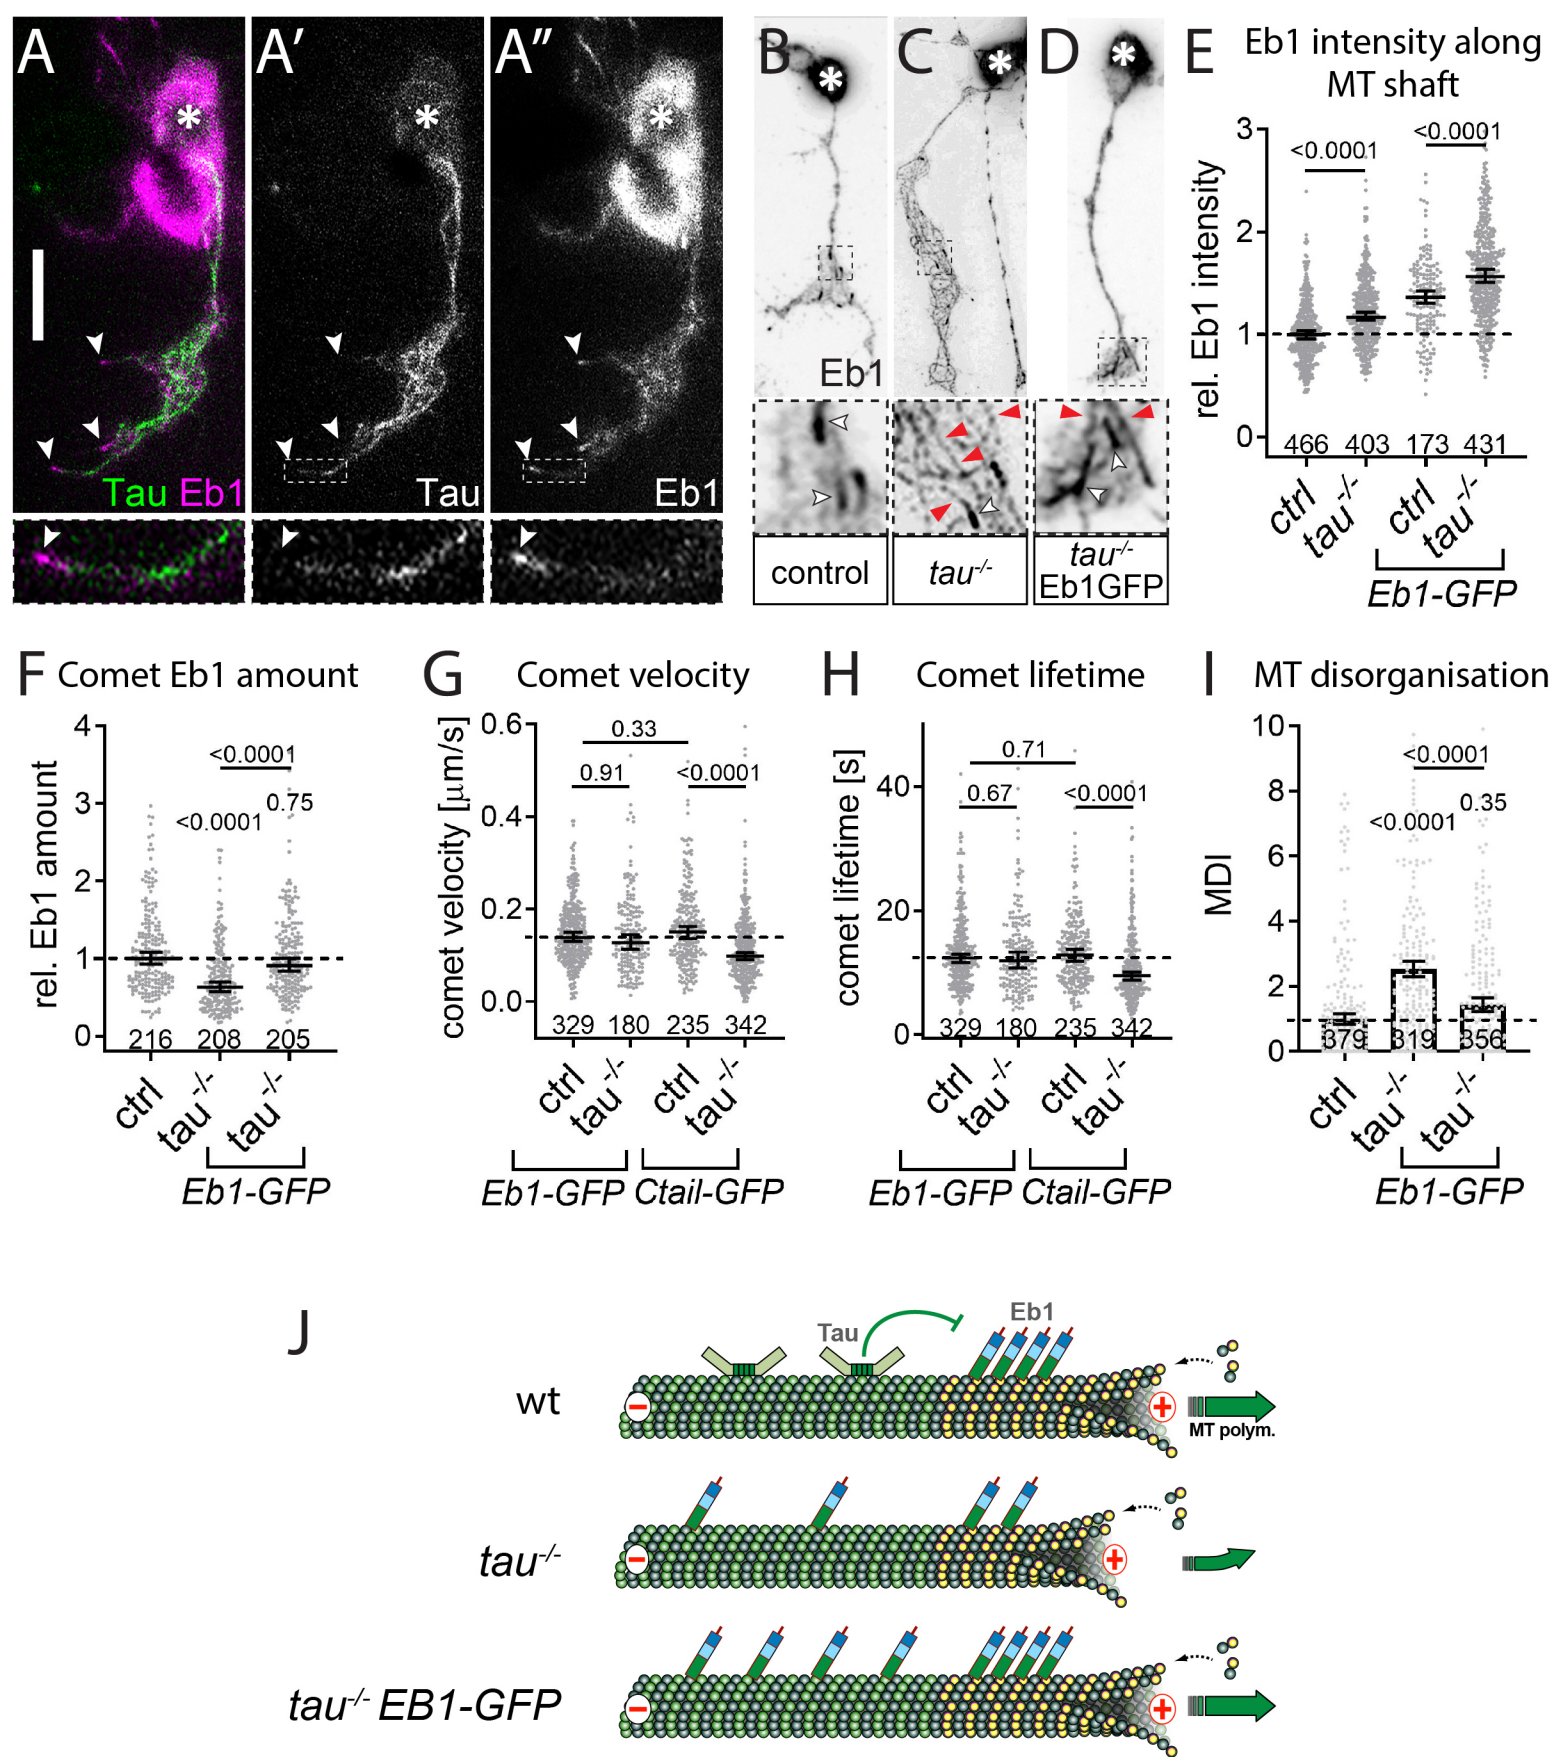

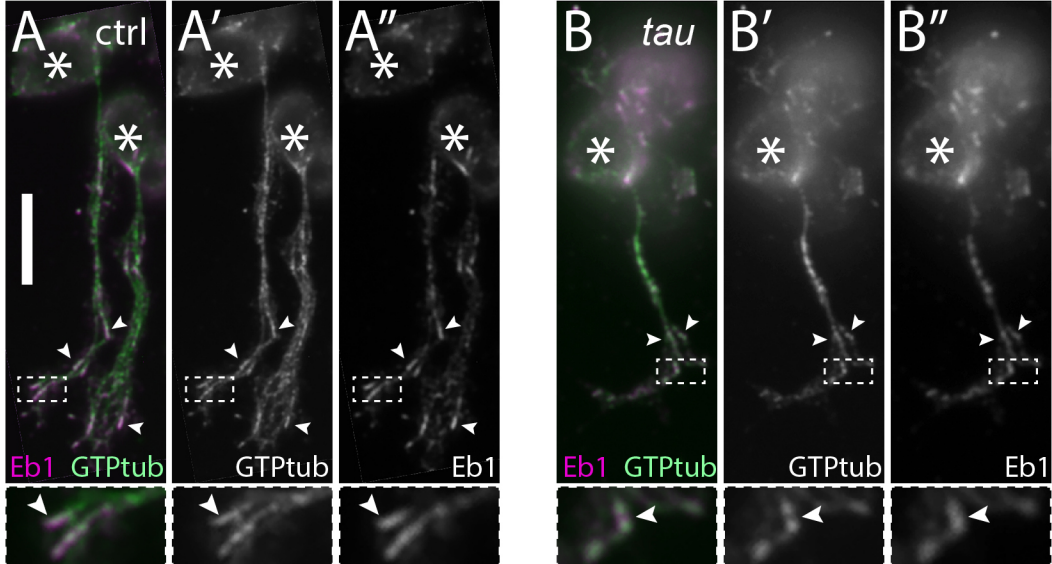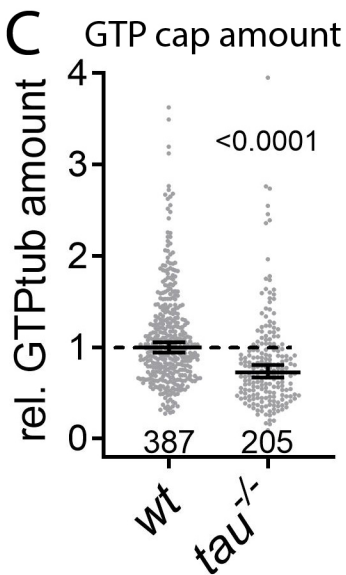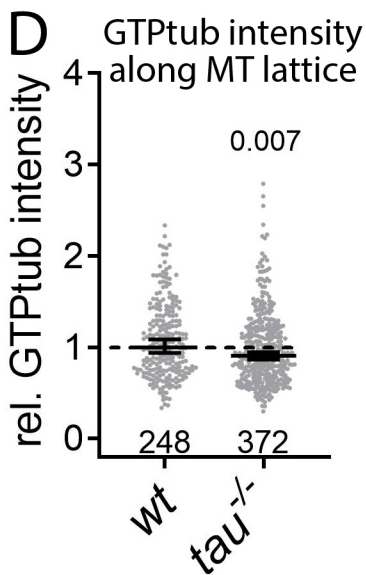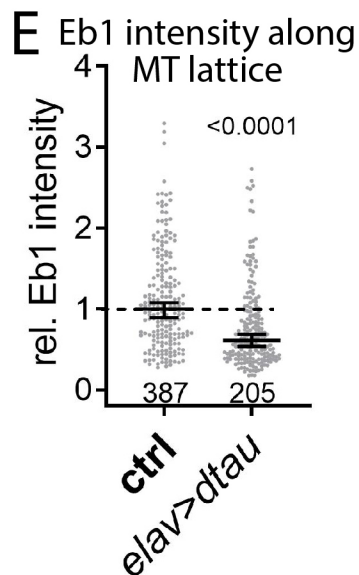

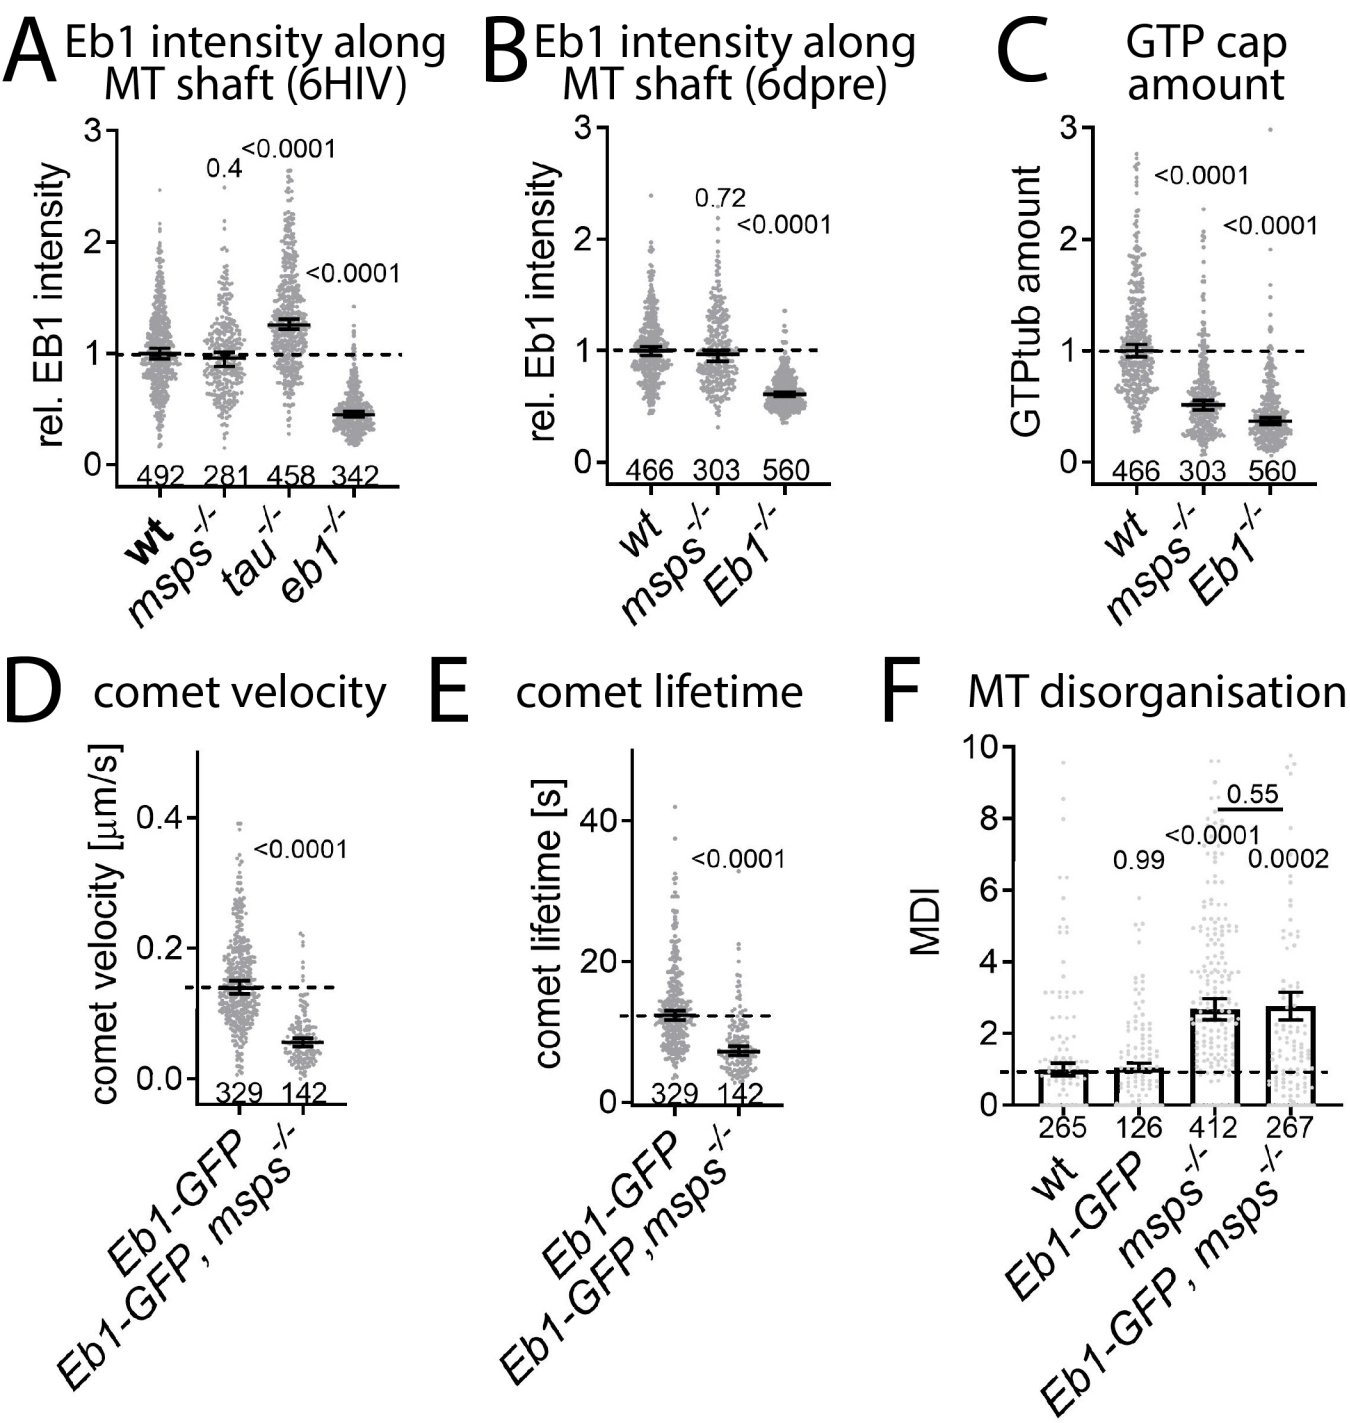



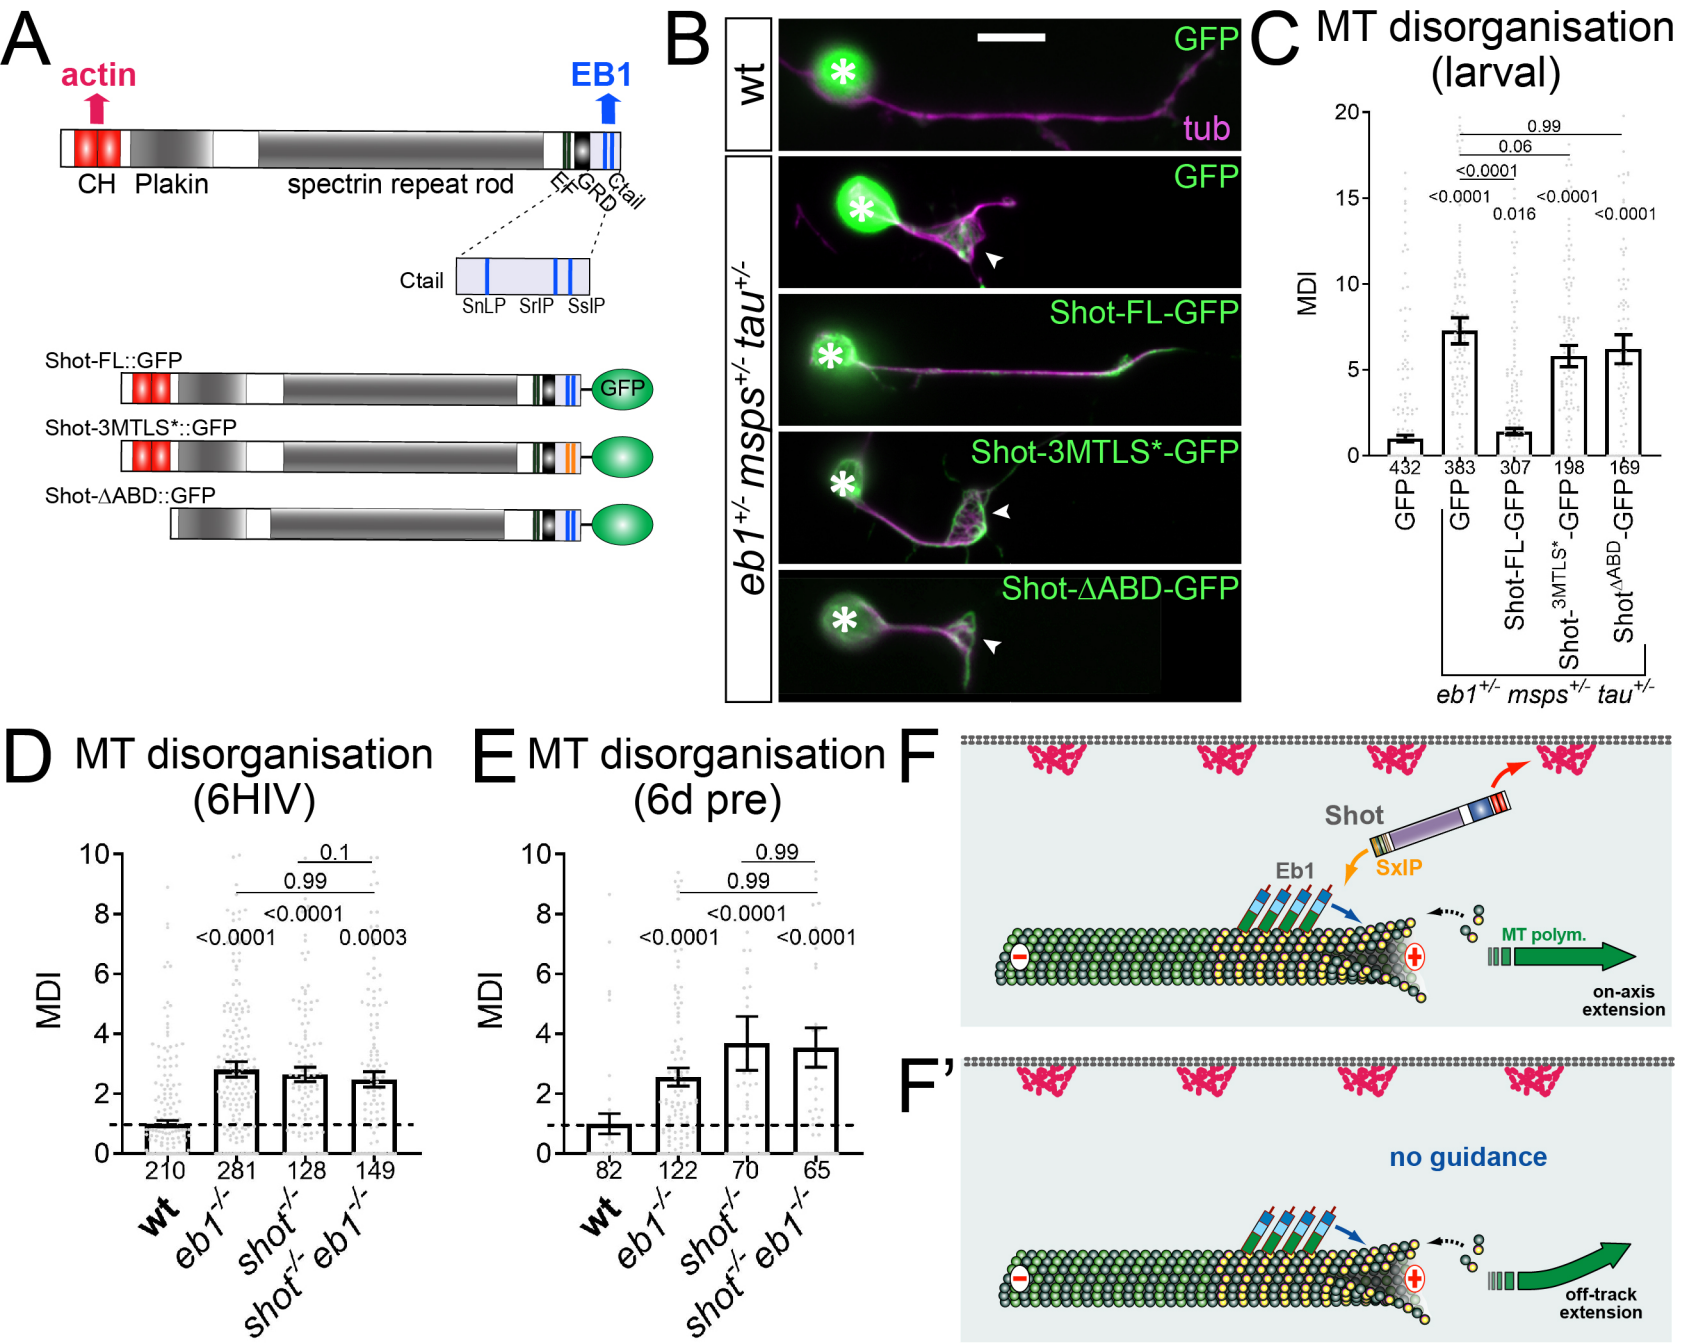

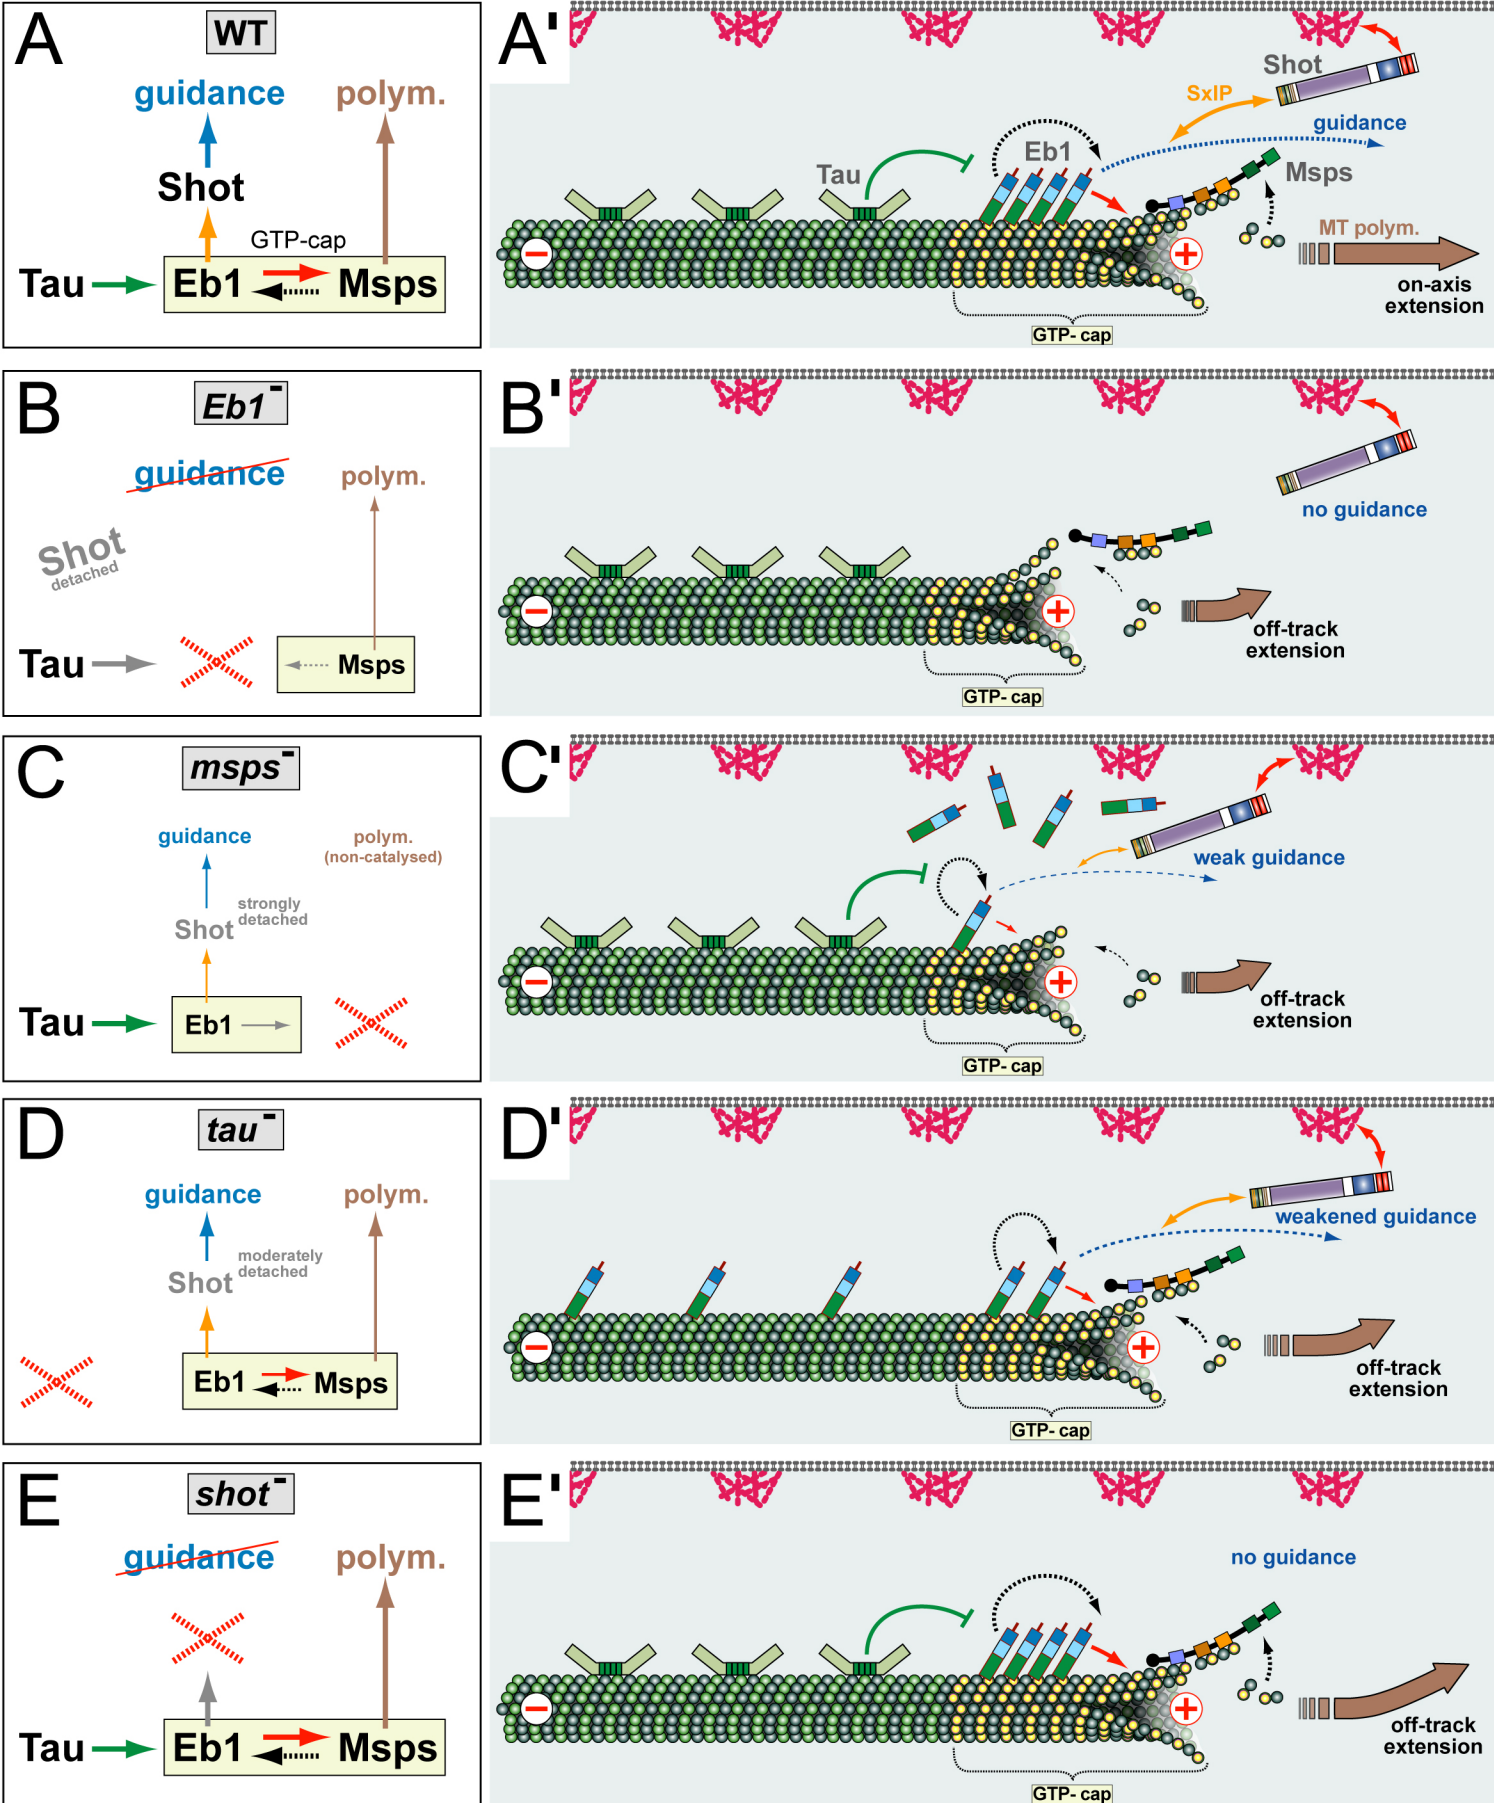

Source: https://www.biorxiv.org/content/10.1101/2020.08.19.257808v1.full.pdf
